# Supplementary material
Source: HighWire-hosted journal article supplement (https://www.cmajopen.ca/highwire/filestream/89368/field_highwire_adjunct_files/10/open-2021-0320-original-submission.pdf)
Supplement: open-2021-0320-original-submission.pdf [file open-2021-0320-original-submission.pdf]

## Unmet healthcare needs during the COVID-19 pandemic among older adults: a prospective cohort study in the Canadian Longitudinal Study on Aging

Jayati Khattar<sup>1</sup>, Laura N. Anderson, PhD<sup>1</sup>, Vanessa De Rubeis MPH<sup>1</sup>, Margaret de Groh PhD<sup>2</sup>, Ying Jiang MSc, MD<sup>2</sup>, Aaron Jones, PhD<sup>1</sup>, Nicole E. Basta, PhD<sup>3</sup>, Susan Kirkland, PhD<sup>4</sup>, Christina Wolfson, PhD<sup>3</sup>, Lauren E. Griffith PhD<sup>1</sup>, Parminder Raina, PhD<sup>1</sup>, on behalf of the Canadian Longitudinal Study on Aging (CLSA) Team

### Affiliations:

1. Department of Health Research Methods, Evidence, and Impact, McMaster University, 1280 Main St. West, Hamilton, Ontario L8S 4L8, Canada
2. Applied Research Division, Center for Surveillance and Applied Research, Public Health Agency of Canada, Ottawa, ON K0A 0K9
3. Department of Epidemiology, Biostatistics and Occupational Health, School of Population and Global Health, McGill University, Montreal, Canada.
4. Department of Community Health & Epidemiology and Division of Geriatric Medicine, Dalhousie University, Halifax, Canada.

**Corresponding author's email address:** [ln.anderson@mcmaster.ca](mailto:ln.anderson@mcmaster.ca)

**Data sharing:** Data are available from the Canadian Longitudinal Study on Aging ([www.clsa-elcv.ca](http://www.clsa-elcv.ca)) for researchers who meet the criteria for access to de-identified CLSA data.

**Funding Statement:** Funding for this study was obtained from the Public Health Agency of Canada (PHAC). Funding for the support of the CLSA COVID-19 Questionnaire based study is provided by Juravinski Research Institute, Faculty of Health Sciences, McMaster University, Provost Fund from McMaster University, McMaster Institute for Research on Aging, Public Health Agency of Canada and the Nova Scotia COVID-19 Health Research Coalition. Funding for the Canadian Longitudinal Study on Aging (CLSA) is provided by the Government of Canada through the Canadian Institutes of Health Research (CIHR) under grant reference: LSA 94473 and the Canada Foundation for Innovation. The CLSA is led by Drs. Parminder Raina, Christina Wolfson and Susan Kirkland. Parminder Raina holds the Raymond and Margaret Labarge Chair in Optimal Aging and Knowledge Application for Optimal Aging, is the Director of the McMaster Institute for Research on Aging and the Labarge Centre for Mobility in Aging and holds a Tier 1 Canada Research Chair in Geroscience. Lauren Griffith is supported by the McLaughlin Foundation Professorship in Population and Public Health.

**Acknowledgements:** This research was made possible using the data/biospecimens collected by the Canadian Longitudinal Study on Aging (CLSA). Funding for the Canadian Longitudinal Study on Aging (CLSA) is provided by the Government of Canada through the Canadian Institutes of Health Research (CIHR) under grant reference: LSA 94473 and the Canada Foundation for Innovation, as well as the following provinces, Newfoundland, Nova Scotia, Quebec, Ontario, Manitoba, Alberta, and British Columbia. This research has been conducted using the CLSA Baseline Tracking Dataset version 3.7, Baseline Comprehensive Dataset version

1  
2  
3 5.1, Follow-up 1 Tracking Dataset version 2.2, Follow-up 1 Comprehensive Dataset version 3.0,  
4 GEN3, Epigeneticsv1.1, COVID 19 questionnaire data, under Application Number 21CON001.  
5 The CLSA is led by Drs. Parminder Raina, Christina Wolfson and Susan Kirkland.  
6  
7

8 **CLSA Team:** Andrew Costa and Cynthia Balion (McMaster University); Yukiko Asada (Dalhousie  
9 University); Benoît Cossette and Melanie Levasseur (University of Sherbrooke); Scott Hofer and  
10 Theone Paterson (University of Victoria); David Hogan and Jacqueline McMillan (University of  
11 Calgary); Teresa Liu-Ambrose (University of British Columbia); Verena Menec and Philip St. John  
12 (University of Manitoba); Gerald Mugford and Zhiwei Gao (Memorial University of  
13 Newfoundland); Vanessa Taler and Patrick Davidson (University of Ottawa); Andrew Wister and  
14 Theodore Cosco (Simon Fraser University).  
15  
16  
17

18 **Disclaimer:** The opinions expressed in this manuscript are the author’s own and do not reflect  
19 the views of the Canadian Longitudinal Study on Aging.  
20  
21  
22  
23  
24  
25  
26  
27  
28  
29  
30  
31  
32  
33  
34  
35  
36  
37  
38  
39  
40  
41  
42  
43  
44  
45  
46  
47  
48  
49  
50  
51  
52  
53  
54  
55  
56  
57  
58  
59  
60

Confidential

## Unmet healthcare needs during the COVID-19 pandemic among older adults: a prospective cohort study in the Canadian Longitudinal Study on Aging

### Abstract

Background: The COVID-19 pandemic has impacted access to healthcare services in Canada. There is, however, limited research examining the influence of the social determinants of health (SDOH) on unmet healthcare needs during the pandemic.

Methods: We analyzed data from a prospective cohort study of 23,972 participants in the Canadian Longitudinal Study on Aging (CLSA) COVID-19 Study (April-December 2020) to identify the SDOH associated with unmet healthcare needs during the pandemic among older adults. Using logistic regression, we assessed the association between several SDOH on the following three outcomes (separately): experiencing any challenges in accessing healthcare services, not going to a hospital or seeing doctor when needed and experiencing barriers to accessing testing for COVID-19.

Results: Overall, we found that from September to December 2020, 25% of Canadian adults indicated they had challenges accessing healthcare services and 8% of participants did not visit a hospital or doctor, when needed. Additionally, 4% of participants reported that they faced barriers accessing COVID-19 testing. The prevalence of all three unmet need outcomes was lower among older age groups and differences were observed by region, education, income, and racial background. Presence of any chronic conditions, immigrant status, and pre-pandemic unmet healthcare needs were associated with higher odds of experiencing challenges accessing healthcare services and not visiting a hospital or seeing a doctor.

Interpretation: Substantial unmet healthcare needs were reported by Canadian adults during the pandemic and these varied by SDOH and chronic conditions. The results of this study have important implications for health equity.

**Key Words:** Unmet Healthcare Needs, COVID-19, CLSA

## Introduction

The first case of COVID-19 was first detected in Canada on January 25<sup>th</sup>, 2020 and by March 2020 all provinces and territories had adopted public health restrictions, such as school and business closures and limits on gatherings, to mitigate its spread.(1) Public health restrictions have continued to varying degrees across Canada.(1) The rapid spread of SARS-CoV-2 and adoption of public health restrictions in Canada fundamentally affected access to healthcare services. To adapt to the additional strain of COVID-19 patients, healthcare systems cancelled elective surgeries and in-person appointments, and reliance on virtual visits increased.(2)(3) National data revealed that emergency room visits decreased by 24% and inpatient admission levels decreased by 10% in 2020.(4)(5) Studies in Canada noted disruptions in home care services and primary care.(6)(7) A systematic review of studies from 20 countries found that healthcare utilization was reduced by a third, due to the pandemic.(8)

Self-perceived unmet needs are a reflection of access to and performance of a healthcare system.(9) Unlike objective measures of healthcare use, unmet needs are dependent not only on the use of services but also their accessibility and acceptability. While virtual visits were often used, patients have reported limitations.(10)(11)(12)(13) Unmet healthcare needs during the COVID-19 pandemic may have serious implications on patient care and potentially long lasting consequences.(14) Independent of the COVID-19 pandemic, it is well known that the social determinants of health (SDOH) impact unmet healthcare needs.(15)(16) However, the impact of SDOH on unmet healthcare needs during the COVID-19 pandemic in older adults in Canada are not yet understood. Disruptions to services may have deepened access concerns for vulnerable groups, potentially having implications for health equity. The objectives of this study were to describe unmet healthcare needs, including COVID-19 testing access, and to evaluate the association between the SDOH and other predictors (pre-pandemic unmet healthcare needs and chronic conditions) on unmet healthcare needs among older adults in Canada during the COVID-19 pandemic.

## Methods

### *Study Design and Data Source*

We conducted a prospective cohort study using data from participants in the Canadian Longitudinal Study on Aging (CLSA). The CLSA is a national long-term study of community-dwelling adults aged 45-85 years at the time of recruitment (2010-2015).(17) Participants were recruited across the 10 provinces and are followed-up every 3 years for at least 20 years or until death or loss-to-follow-up. Residents of the three territories or First Nations reserves, members of the Armed Forces, and institutionalized persons were excluded. Participants were required to participate in English or French and complete the survey independently. At baseline, 51,338 individuals participated in the CLSA (2011-2015) and 44,817 went on to complete follow up one (FUP1) (2015-18).

In response to the COVID-19 pandemic, the CLSA COVID-19 Questionnaire Study was launched to collect longitudinal data over a 9-month period with participants completing a 30-minute baseline questionnaire (April 15<sup>th</sup>-May 30<sup>th</sup>, 2020), 10-minute weekly/biweekly/monthly questionnaires, and a 30-minute exit questionnaire (September 29<sup>th</sup>-December 29<sup>th</sup>, 2020). All eligible members of the CLSA cohort (i.e., alive, with known contact information and able to independently complete the survey) were invited to participate (N=42,511) of whom 28,559 individuals participated in the CLSA COVID-19 study (response=67%). Sociodemographic characteristics and pre-pandemic unmet healthcare needs were measured during CLSA baseline (2011-2015) and FUP1 (2015-2018).

### *Measurement of Unmet Healthcare Needs*

Unmet healthcare needs during the COVID-19 pandemic were measured using three questions in the CLSA COVID-19 exit survey: 1) "Since the beginning of the COVID-19 pandemic have you experienced any challenges in accessing healthcare?", 2) "Since March 1st, 2020 were there times when you did not go to the hospital or to see a doctor even though you needed to?" , and 3) "Since the beginning of the COVID-19 pandemic have you experienced barriers to accessing testing for COVID-19?". For each of the three questions, the response options were "Yes," "No," "Don't know/No answer," and "Prefer not to answer." "Don't know/No answer"

1  
2  
3 responses were grouped together with the “No” responses, as they most likely reflected a lack  
4 of perceived unmet needs. It was observed that nearly 12% of the respondents answered  
5 “Don’t know/No Answer” to the question of experiencing barriers to COVID-19 testing, while  
6 fewer than 2% of respondents indicated the option for the two other questions. To further  
7 explore this, a sensitivity analysis was conducted to determine if the categorization of the  
8 outcomes as “No” compared to missing affected the results, and no differences were observed.  
9  
10  
11  
12  
13

14 Participants who answered “Yes” to any of the three unmet healthcare questions were  
15 asked follow-up questions about the types of challenges they had when accessing healthcare,  
16 the reasons they did not visit the hospital or see a doctor and the barriers they faced when  
17 accessing COVID-19 testing. The frequency of the follow up questions will be reported,  
18 stratified by age and province.  
19  
20  
21  
22  
23  
24  
25

### 26 *Measurement of the Social Determinants of Health and Other Predictors*

27  
28 Information on the SDOH were extracted from the CLSA surveys, across different time  
29 points. Sex, racial background, education and immigrant status were extracted from CLSA’s  
30 baseline (2011-2015), while household income, dwelling type and marital status were from  
31 FUP1 (2015-2018). Age, region of residence (Atlantic: Newfoundland, Nova Scotia, P.E.I., New  
32 Brunswick; Quebec; Ontario; Prairies: Alberta, Saskatchewan, Manitoba; British Columbia),  
33 urban/rural status and work status were extracted from the COVID-19 baseline survey.  
34  
35 Urban/rural status has been measured by linking the participants’ postal codes to the Statistics  
36 Canada Postal Code Conversion file.(18) Work status was determined by asking participants if  
37 they usually worked outside of their residence. Dwelling type was measured by asking if they  
38 lived in a house, apartment/condominium, or other residence type (senior’s housing, institution  
39 or mobile home). In addition to the SDOH, the presence of unmet needs prior to the pandemic  
40 was extracted from FUP1 when participants were asked, “During the past 12 months, was there  
41 ever a time when you felt that you needed healthcare but you didn't receive it?”. The presence  
42 of chronic conditions was measured in the COVID-19 baseline survey, by inquiring about the  
43 lifetime occurrence of asthma, chronic obstructive pulmonary disease, other chronic lung  
44 diseases, diabetes, high blood pressure, heart disease, cancer,  
45  
46  
47  
48  
49  
50  
51  
52  
53  
54  
55  
56  
57  
58  
59  
60

1  
2  
3 heart/lung/kidney/liver/pancreas failure, autoimmune disorder, pneumonia and human  
4 immunodeficiency virus.  
5  
6  
7

### 8 *Statistical Analysis*

9  
10 Of the 28,559 individuals who participated in the COVID-19 study, information on  
11 23,975 individuals was available at CLSA baseline, FUP1 and throughout the CLSA COVID-19  
12 study (at both baseline and exit). Three individuals were excluded from the analysis as they  
13 resided in the territories in 2020, resulting in a final analytic sample size of 23,972. We  
14 compared descriptive characteristics at COVID-19 exit to FUP1, to assess how the participants  
15 varied across the timepoints and consider how results of our study might differ if all  
16 participants from FUP1 had completed the COVID-19 exit survey.  
17  
18  
19  
20  
21  
22

23 Proportions of participants who reported the unmet healthcare needs outcomes along  
24 with 95% confidence intervals (CI) were computed overall and by each category of SDOH. The  
25 magnitude of the association between each of SDOH and the three unmet healthcare  
26 outcomes, was estimated using logistic regression. Odds ratios and 95% CIs were first estimated  
27 for unadjusted models with each predictor variable on its own. Then, an adjusted model that  
28 included all of the following variables was estimated: sex, age, province, urban/rural, racial  
29 background, immigrant status, household income, education, marital status, dwelling type,  
30 work status, chronic condition status and pre-pandemic unmet needs. Variance inflation factors  
31 (VIF) for the adjusted models were estimated in a linear regression model to assess multi-  
32 collinearity.  
33  
34  
35  
36  
37  
38  
39  
40  
41  
42  
43

### 44 **Results**

45 Table 1 presents the sociodemographic characteristics of the participants who  
46 completed FUP1 and the COVID-19 exit survey. The sample is made up of an equal proportion  
47 of males and females, with participants largely living in urban areas. Table 1 illustrates that the  
48 sociodemographic characteristics of the participants who completed data collection up to FUP1  
49 are similar to those that completed the COVID-19 exit survey, as has been previously  
50 demonstrated.<sup>(19)</sup> Table 1 also reports the prevalence of each of the three unmet need  
51  
52  
53  
54  
55  
56  
57  
58  
59  
60

1  
2  
3 outcomes. Overall, 25% of the participants indicated that they faced challenges accessing  
4 healthcare and 8% of the participants indicated that they did not visit a hospital or see a doctor  
5 even though they needed to. Additionally, 4% of participants indicated that they faced barriers  
6 accessing testing for COVID-19.  
7  
8  
9

10 Table 2 reports the logistic regression results examining the associations between each  
11 of the sociodemographic characteristics, including history of chronic disease and unmet needs  
12 prior to the pandemic, and the three unmet need outcomes. Notably, older age was associated  
13 with lower odds of reporting all three outcomes. In addition, self-report of unmet healthcare  
14 needs prior to the pandemic was strongly associated with higher odds of all three outcomes.  
15  
16  
17  
18

19 Immigrants and those with chronic conditions were more likely to face any challenges  
20 accessing healthcare, as well as not visiting a hospital or seeing a doctor when they needed to.  
21 Higher education levels were associated with higher odds of indicating any challenges accessing  
22 healthcare and barriers to COVID-19 testing. While lower income was associated with increased  
23 odds of not visiting the hospital or seeing a doctor when they needed to, higher income was  
24 associated with increased odds of challenges accessing healthcare and barriers to COVID-19  
25 testing. Females were more likely than males to report not visiting the hospital or seeing a  
26 doctor when needed. Similarly, participants who identified as non-white had higher odds of  
27 reporting not visiting the hospital or seeing a doctor when they needed to, relative to white  
28 individuals.  
29  
30  
31  
32  
33  
34  
35  
36  
37

38 Statistically significant geographic variation was observed across Canada, with Ontario  
39 participants being the most likely to report challenges accessing healthcare and barriers to  
40 COVID-19 testing. Quebec residents were most likely to not visit a hospital or doctor, while  
41 being the least likely to indicate the other two outcomes. The results of fully adjusted models,  
42 adjusted for all SDOH variables simultaneously, revealed similar associations, with few  
43 exceptions (e.g., the association between racial background and barriers to testing changes  
44 direction but is not statistically significant in the adjusted or unadjusted models) (see  
45 Supplementary Table 1).  
46  
47  
48  
49  
50  
51

52 Participants were most likely to report difficulties with accessing the healthcare services  
53 of primary care and specialist care (Supplementary Table 2). The most common reasons for not  
54  
55  
56  
57  
58  
59  
60



1  
2  
3 seeking care were redirection of services to priority groups and fear of COVID-19 contact  
4 (Supplementary Table 3). Redirection of services was of greater concern among adults aged 50-  
5 54, than those aged 85-96 (Figure 4). The most common barrier to COVID-19 testing that  
6  
7 participants reported was not being eligible, which was most commonly reported by adults  
8  
9 aged 50-54 (Figure 5).  
10  
11  
12  
13

### 14 **Interpretation**

15  
16 We found that a quarter of older adults surveyed (25%) faced challenges accessing  
17 healthcare services and 8% did not go to the hospital or to see a doctor even though they  
18 needed to during the first 9 months of the pandemic in Canada. About 4% of the sample  
19 indicated that they faced barriers accessing COVID-19 testing. Reporting of any of the three  
20 unmet healthcare needs decreased with older age. Pre-pandemic unmet needs were strongly  
21 associated with all three outcomes. Regional differences in the level of unmet healthcare needs  
22 were noted.  
23  
24  
25  
26  
27  
28  
29  
30

31 While it may be surprising that older adults reported lower levels of unmet need, it is  
32 consistent with previous research on unmet healthcare needs of Canadians from the 2001-2014  
33 Canadian Community Health Survey (CCHS).(20) In Europe, older individuals aged 80 or over  
34 reported the lowest level of challenges accessing healthcare during the pandemic.(21) We  
35 found that services being redirected to priority groups was a primary concern for adults aged  
36 50-54 but not for adults aged 85-96. In Ontario, the lowest decline in primary care visits was  
37 observed in adults above the age of 75.(6) Furthermore, we found that not being eligible for  
38 COVID-19 testing was of greater concern to adults aged 50-54 than those aged 85-96, which  
39 may be consistent with provincial testing restrictions that may have prioritized older  
40 symptomatic adults.(22) Statistics Canada reported in June 2020 that younger adults (aged 25-  
41 44) were more likely to indicate that they would seek testing than older adults (aged 65+).(23)  
42 Thus, they may be more likely to indicate barriers in attaining the service.  
43  
44  
45  
46  
47  
48  
49  
50  
51

52 Participants with chronic conditions and immigrants were significantly more likely to  
53 indicate challenges accessing healthcare services and not visiting a hospital or doctor. This  
54  
55  
56  
57  
58  
59  
60

1  
2  
3 finding aligns with previous work on the connection between chronic conditions and unmet  
4 needs and established difficulties in accessing healthcare services by  
5 immigrants.(24)(25)(26)(16) Statistically significant variation by racial background was only  
6  
7 noted for one outcome, with non-white participants more likely to report not visiting a hospital  
8  
9 or seeing a doctor than white participants. Research has found that non-white Canadians are  
10  
11 less likely to have a regular physician.(27) Consistent with other national data, we found  
12  
13 minimal evidence of differences in COVID-19 testing by racial background but it is a major  
14  
15 limitation of our study that only 3% of the participants were non-white.(28) Females were 13%  
16  
17 more likely to indicate not seeking hospital or doctor attention, which aligns with previous  
18  
19 research indicating women are more likely to report unmet needs.(20)  
20

21  
22 Higher education levels were associated with an increased odds of indicating challenges  
23  
24 accessing healthcare, which is consistent with CCHS findings.(20) Participants with higher levels  
25  
26 of education were also more likely to indicate barriers accessing COVID-19 testing in our study,  
27  
28 consistent with research from Statistics Canada.(23) While participants with higher levels of  
29  
30 income were more likely to report challenges accessing healthcare and barriers to COVID-19  
31  
32 testing, they were less likely to report not visiting a hospital or seeing a doctor. Higher income  
33  
34 individuals tend to be less likely to forego care.(29)(30)

35  
36 Regional differences in unmet healthcare needs were not uniform across the outcomes.  
37  
38 While Quebec residents were the most likely to indicate not visiting a hospital or doctor,  
39  
40 Ontario and B.C. residents were the most likely to indicate facing any challenges accessing  
41  
42 healthcare and barriers to COVID-19 testing. We explored whether these differences were due  
43  
44 to the language in which the survey was completed (French vs English), but it was difficult to  
45  
46 distinguish language from region since most French surveys were completed in Quebec.  
47  
48 Research has suggested that Quebec residents are more likely to lack access to a family  
49  
50 physician.(31) It is reasonable that Ontario and B.C. residents reported higher levels of unmet  
51  
52 need, given the high case counts in the provinces.(32) Residents of the Prairies did not report  
53  
54 higher levels of unmet need, in spite of high case incidence.(32) Urban and rural participants  
55  
56 did not exhibit significantly different levels of unmet need.  
57  
58  
59  
60

1  
2  
3 *Limitations:* Our study described the unmet healthcare needs of nearly 24,000 older adults in  
4 Canada during the COVID-19 pandemic. While it is a strength that data on potential predictors  
5 of unmet healthcare needs were available prior to the pandemic, including a measure of pre-  
6 pandemic unmet healthcare needs, we are unable to quantify the change in unmet healthcare  
7 needs due to slightly different measures used in FUP1 and during the pandemic. However,  
8 given the reasons for not seeking care indicated by participants, namely fear of COVID-19  
9 contact and services redirected to priority groups, it is clear that the COVID-19 pandemic  
10 influenced access to healthcare services. While we did not use objective measurements of  
11 healthcare utilization, using self-report data provided insight into how participants perceived  
12 the availability of care during the pandemic. Lastly, recruitment for the CLSA at baseline  
13 excluded institutionalized persons, residents of three territories or First Nations reserves,  
14 individuals not able to participate in English or French and the inclusion of only a small  
15 proportion of non-white participants, has the potential to limit the generalizability of the  
16 results.(17)  
17  
18  
19  
20  
21  
22  
23  
24  
25  
26  
27  
28  
29  
30

### 31 **Conclusion**

32 We examined how the perception of access to healthcare services among Canadians was  
33 affected by COVID-19. By focusing on the social determinants of health, the study presented  
34 how perceived barriers to services and inadequacies in access to care persisted in the Canadian  
35 healthcare system during the pandemic. The findings suggest that unmet need was lower in  
36 older age groups and varied by education, income, immigration status, racial background and  
37 region. Given that the presence of chronic conditions and pre-pandemic unmet needs were also  
38 associated with higher odds of reporting unmet healthcare needs, there is evidence that  
39 individuals with pre-existing vulnerabilities experience difficulties when trying to access  
40 healthcare services. It is clear that efforts must continue to ensure adequate care for  
41 Canadians, perhaps especially in times of crisis such as the COVID-19 pandemic.  
42  
43  
44  
45  
46  
47  
48  
49  
50  
51  
52  
53  
54  
55  
56  
57  
58  
59  
60

1  
2  
3  
4  
5  
6  
7  
8  
9  
10  
11  
12  
13  
14  
15  
16  
17  
18  
19  
20  
21  
22  
23  
24  
25  
26  
27  
28  
29  
30  
31  
32  
33  
34  
35  
36  
37  
38  
39  
40  
41  
42  
43  
44  
45  
46  
47  
48  
49  
50  
51  
52  
53  
54  
55  
56  
57  
58  
59  
60

Confidential

Table 1: Descriptive characteristics of adults who completed the CLSA F1 (2015-2018) and COVID-19 exit surveys (Sept. to Dec. 2020)

|                                      | <b>CLSA FUP1<br/>(N=44812)</b> | <b>COVID-19 Exit<br/>Survey (N=23972)</b> |
|--------------------------------------|--------------------------------|-------------------------------------------|
|                                      | N (%)                          | N (%)                                     |
| <b>Sex<sup>1</sup></b>               |                                |                                           |
| Female                               | 22943 (51.2)                   | 12743 (53.2)                              |
| Male                                 | 21869 (48.8)                   | 11229 (46.8)                              |
| <b>Age<sup>2,3</sup></b>             |                                |                                           |
| 50-54                                | 6598 (14.7)                    | 1097 (4.6)                                |
| 55-64                                | 14749 (32.9)                   | 7250 (30.2)                               |
| 65-74                                | 13301 (29.7)                   | 8759 (36.5)                               |
| 75-84                                | 8365 (18.7)                    | 5145 (21.5)                               |
| 85-96                                | 1799 (4.0)                     | 1721 (7.2)                                |
| <b>Region<sup>2,3</sup></b>          |                                |                                           |
| Atlantic                             | 8831 (19.7)                    | 4334 (18.0)                               |
| Prairies                             | 9531 (21.3)                    | 5130 (21.4)                               |
| Ontario                              | 9831 (21.9)                    | 5554 (23.2)                               |
| Quebec                               | 8546 (19.1)                    | 4336 (18.1)                               |
| British Columbia                     | 8073 (18.0)                    | 4618 (19.3)                               |
| <b>Urban/Rural<sup>2,33</sup></b>    |                                |                                           |
| Rural area                           | 6658 (14.9)                    | 4245 (17.8)                               |
| Urban area                           | 38123 (85.1)                   | 19602 (82.2)                              |
| Missing                              | 31                             | 125                                       |
| <b>Racial background<sup>1</sup></b> |                                |                                           |
| White                                | 43166 (96.4)                   | 23273 (97.2)                              |
| Non-white                            | 1600 (3.6)                     | 673 (2.8)                                 |
| Missing                              | 46                             | 26                                        |
| <b>Immigrant status<sup>1</sup></b>  |                                |                                           |
| Immigrant                            | 7171 (16.0)                    | 3789 (15.8)                               |
| Non-immigrant                        | 37629 (84.0)                   | 20173 (84.2)                              |

1  
2  
3  
4  
5  
6  
7  
8  
9  
10  
11  
12  
13  
14  
15  
16  
17  
18  
19  
20  
21  
22  
23  
24  
25  
26  
27  
28  
29  
30  
31  
32  
33  
34  
35  
36  
37  
38  
39  
40  
41  
42  
43  
44  
45  
46  
47

|                                                     |              |              |
|-----------------------------------------------------|--------------|--------------|
| Missing                                             | 12           | 10           |
| <b>Household income<sup>2</sup></b>                 |              |              |
| Less than \$20,000                                  | 2083 (5.0)   | 861 (3.8)    |
| \$20,000 to <\$50,000                               | 9929 (23.9)  | 4855 (21.4)  |
| \$50,000 to <\$100,000                              | 15122 (36.4) | 8569 (37.9)  |
| \$100,000 to <\$150,000                             | 7807 (18.8)  | 4589 (20.3)  |
| \$150,000 or more                                   | 6616 (15.9)  | 3758 (16.6)  |
| Missing                                             | 3255         | 1340         |
| <b>Education<sup>1</sup></b>                        |              |              |
| Less than secondary school                          | 2669 (6.0)   | 1101 (4.6)   |
| Secondary school                                    | 4734 (10.6)  | 2349 (9.8)   |
| Some post-secondary                                 | 3312 (7.4)   | 1719 (7.2)   |
| Post-secondary degree/diploma                       | 33994 (76.0) | 18756 (78.4) |
| Missing                                             | 103          | 47           |
| <b>Marital status<sup>2</sup></b>                   |              |              |
| Single, never married or never lived with a partner | 3882 (8.7)   | 2007 (8.4)   |
| Married or living with a partner                    | 30538 (68.2) | 16833 (70.3) |
| Widowed                                             | 4921 (11.0)  | 2332 (9.7)   |
| Divorced or separated                               | 5449 (12.1)  | 2785 (11.6)  |
| Missing                                             | 22           | 15           |
| <b>Dwelling type<sup>2,3</sup></b>                  |              |              |
| House                                               | 35544 (79.3) | 18625 (77.8) |
| Apartment or condominium                            | 8006 (17.9)  | 4410 (18.4)  |
| Other                                               | 1259 (2.8)   | 907 (3.8)    |
| Missing                                             | 3            | 30           |
| <b>Chronic conditions<sup>3,4</sup></b>             |              |              |
| Present                                             | N/A          | 14235 (59.7) |
| Absent                                              | N/A          | 9594 (40.3)  |
| Missing                                             | N/A          | 143          |
| <b>Work status<sup>3,4</sup></b>                    |              |              |

|                                                                                               |              |              |
|-----------------------------------------------------------------------------------------------|--------------|--------------|
| Usually work outside the home                                                                 | N/A          | 6273 (26.6)  |
| Do not work outside the home                                                                  | N/A          | 17357 (73.4) |
| Missing                                                                                       | N/A          | 342          |
| <b>Unmet needs (pre-pandemic)<sup>2</sup></b>                                                 |              |              |
| Yes                                                                                           | 3756 (8.5)   | 1874 (7.8)   |
| No                                                                                            | 40682 (91.5) | 22060 (92.2) |
| Missing                                                                                       | 374          | 38           |
| <b>Any challenges in accessing healthcare<sup>4,5</sup></b>                                   |              |              |
| Yes                                                                                           | N/A          | 5992 (25.3)  |
| No                                                                                            | N/A          | 17759 (74.7) |
| Missing                                                                                       | N/A          | 221          |
| <b>Did not go to the hospital or to see a doctor even though they needed to<sup>4,5</sup></b> |              |              |
| Yes                                                                                           | N/A          | 1776 (7.5)   |
| No                                                                                            | N/A          | 21989 (92.5) |
| Missing                                                                                       | N/A          | 207          |
| <b>Experienced barriers to accessing testing for COVID-19<sup>4,5</sup></b>                   |              |              |
| Yes                                                                                           | N/A          | 917 (3.9)    |
| No                                                                                            | N/A          | 22828 (96.1) |
| Missing                                                                                       | N/A          | 227          |

<sup>1</sup> Extracted from CLSA baseline survey (2011-2015)

<sup>2</sup> Extracted from CLSA follow up one (2015-2018)

<sup>3</sup> Extracted from CLSA COVID-19 baseline survey (April-May 2020)

<sup>4</sup> Variables were not measured equivalently in FUP1, so a direct comparison was not possible

<sup>5</sup> Extracted from CLSA COVID-19 exit survey (September-December 2020)

1  
2  
3  
4  
5  
6  
7  
8  
9  
10  
11  
12  
13  
14  
15  
16  
17  
18  
19  
20  
21  
22  
23  
24  
25  
26  
27  
28  
29  
30  
31  
32  
33  
34  
35  
36  
37  
38  
39  
40  
41  
42  
43  
44  
45  
46  
47

Table 2: Logistic regression models assessing the association between sociodemographic characteristics and unmet healthcare needs during the COVID-19 pandemic as reported by participants during the CLSA COVID-19 exit survey (Sept. to Dec. 2020)

|                          | Any challenges in accessing healthcare<br><b>OR (95% CI)</b> | Did not go to the hospital or to see a doctor even though they needed to<br><b>OR (95% CI)</b> | Experienced barriers to accessing testing for COVID-19<br><b>OR (95% CI)</b> |
|--------------------------|--------------------------------------------------------------|------------------------------------------------------------------------------------------------|------------------------------------------------------------------------------|
| <b>Sex</b>               |                                                              |                                                                                                |                                                                              |
| Male                     | Reference                                                    | Reference                                                                                      | Reference                                                                    |
| Female                   | 1.01 (0.95, 1.07)                                            | 1.20 (1.09, 1.32)                                                                              | 0.92 (0.80, 1.05)                                                            |
| <b>Age</b>               |                                                              |                                                                                                |                                                                              |
| 50-55                    | Reference                                                    | Reference                                                                                      | Reference                                                                    |
| 55-64                    | 0.88 (0.77, 1.02)                                            | 0.78 (0.63, 0.97)                                                                              | 0.72 (0.55, 0.94)                                                            |
| 65-74                    | 0.88 (0.77, 1.02)                                            | 0.74 (0.60, 0.91)                                                                              | 0.59 (0.45, 0.77)                                                            |
| 75-84                    | 0.73 (0.63, 0.85)                                            | 0.59 (0.47, 0.74)                                                                              | 0.45 (0.34, 0.60)                                                            |
| 85-96                    | 0.52 (0.43, 0.62)                                            | 0.51 (0.36, 0.68)                                                                              | 0.37 (0.25, 0.55)                                                            |
| <b>Region</b>            |                                                              |                                                                                                |                                                                              |
| Atlantic                 | Reference                                                    | Reference                                                                                      | Reference                                                                    |
| Quebec                   | 0.48 (0.43, 0.54)                                            | 1.38 (1.19, 1.61)                                                                              | 0.80 (0.58, 1.10)                                                            |
| Ontario                  | 1.22 (1.11, 1.33)                                            | 0.97 (0.83, 1.13)                                                                              | 3.40 (2.68, 4.32)                                                            |
| Prairies                 | 0.73 (0.67, 0.80)                                            | 0.74 (0.63, 0.87)                                                                              | 1.92 (1.48, 2.48)                                                            |
| British Columbia         | 1.03 (0.94, 1.13)                                            | 0.92 (0.79, 1.08)                                                                              | 2.37 (1.84, 3.06)                                                            |
| <b>Urban/Rural</b>       |                                                              |                                                                                                |                                                                              |
| Urban                    | Reference                                                    | Reference                                                                                      | Reference                                                                    |
| Rural                    | 0.93 (0.86, 1.00)                                            | 1.06 (0.93, 1.20)                                                                              | 0.79 (0.65, 0.95)                                                            |
| <b>Racial background</b> |                                                              |                                                                                                |                                                                              |
| White                    | Reference                                                    | Reference                                                                                      | Reference                                                                    |
| Non-white                | 0.91 (0.76, 1.10)                                            | 1.37 (1.06, 1.78)                                                                              | 1.09 (0.74, 1.60)                                                            |
| <b>Immigrant status</b>  |                                                              |                                                                                                |                                                                              |
| Non-immigrant            | Reference                                                    | Reference                                                                                      | Reference                                                                    |



|                                                     |                   |                   |                   |
|-----------------------------------------------------|-------------------|-------------------|-------------------|
| Immigrant                                           | 1.18 (1.09, 1.27) | 1.26 (1.11, 1.43) | 1.15 (0.97, 1.37) |
| <b>Household income</b>                             |                   |                   |                   |
| Less than \$20,000                                  | 0.81 (0.68, 0.97) | 1.52 (1.18, 1.97) | 0.66 (0.46, 0.97) |
| \$20,000 to <\$50,000                               | 0.80 (0.73, 0.89) | 1.19 (1.01, 1.40) | 0.56 (0.45, 0.69) |
| \$50,000 to <\$100,000                              | 0.89 (0.82, 0.98) | 1.03 (0.89, 1.20) | 0.56 (0.47, 0.68) |
| \$100,000 to <\$150,000                             | 1.03 (0.93, 1.13) | 1.05 (0.89, 1.24) | 0.68 (0.56, 0.83) |
| \$150,000 or more                                   | Reference         | Reference         | Reference         |
| <b>Education</b>                                    |                   |                   |                   |
| Less than secondary school                          | 0.58 (0.50, 0.69) | 1.02 (0.81, 1.29) | 0.54 (0.36, 0.81) |
| Secondary school                                    | 0.74 (0.66, 0.82) | 0.96 (0.81, 1.14) | 0.52 (0.39, 0.67) |
| Some post-secondary                                 | 1.02 (0.91, 1.14) | 1.09 (0.90, 1.30) | 0.90 (0.70, 1.16) |
| Post-secondary diploma or more                      | Reference         | Reference         | Reference         |
| <b>Marital status</b>                               |                   |                   |                   |
| Married or living with a partner                    | Reference         | Reference         | Reference         |
| Single, never married or never lived with a partner | 1.02 (0.92, 1.14) | 1.16 (0.98, 1.38) | 1.15 (0.92, 1.45) |
| Widowed                                             | 0.76 (0.70, 0.84) | 1.02 (0.87, 1.21) | 0.72 (0.56, 0.94) |
| Divorced or separated                               | 1.03 (0.94, 1.13) | 1.40 (1.21, 1.61) | 1.13 (0.92, 1.38) |
| <b>Chronic conditions</b>                           |                   |                   |                   |
| Absent                                              | Reference         | Reference         | Reference         |
| Present                                             | 1.35 (1.27, 1.43) | 1.45 (1.31, 1.61) | 0.97 (0.85, 1.11) |
| <b>Dwelling type</b>                                |                   |                   |                   |
| House                                               | Reference         | Reference         | Reference         |
| Apartment                                           | 0.90 (0.83, 0.97) | 1.09 (0.97, 1.23) | 1.01 (0.85, 1.19) |
| Other                                               | 0.74 (0.63, 0.88) | 1.08 (0.84, 1.38) | 0.59 (0.38, 0.92) |
| <b>Work status</b>                                  |                   |                   |                   |
| Do not work outside the home                        | Reference         | Reference         | Reference         |
| Usually work outside the home                       | 1.07 (1.01, 1.15) | 1.05 (0.94, 1.17) | 1.43 (1.24, 1.65) |
| <b>Unmet needs (Pre-pandemic)</b>                   |                   |                   |                   |
| Yes                                                 | 2.21 (2.00, 2.44) | 2.91 (2.55, 3.33) | 1.77 (1.45, 2.16) |
| No                                                  | Reference         | Reference         | Reference         |

1  
2  
3  
4  
5  
6  
7  
8  
9  
10  
11  
12  
13  
14  
15  
16  
17  
18  
19  
20  
21  
22  
23  
24  
25  
26  
27  
28  
29  
30  
31  
32  
33  
34  
35  
36  
37  
38  
39  
40  
41  
42  
43  
44  
45  
46  
47

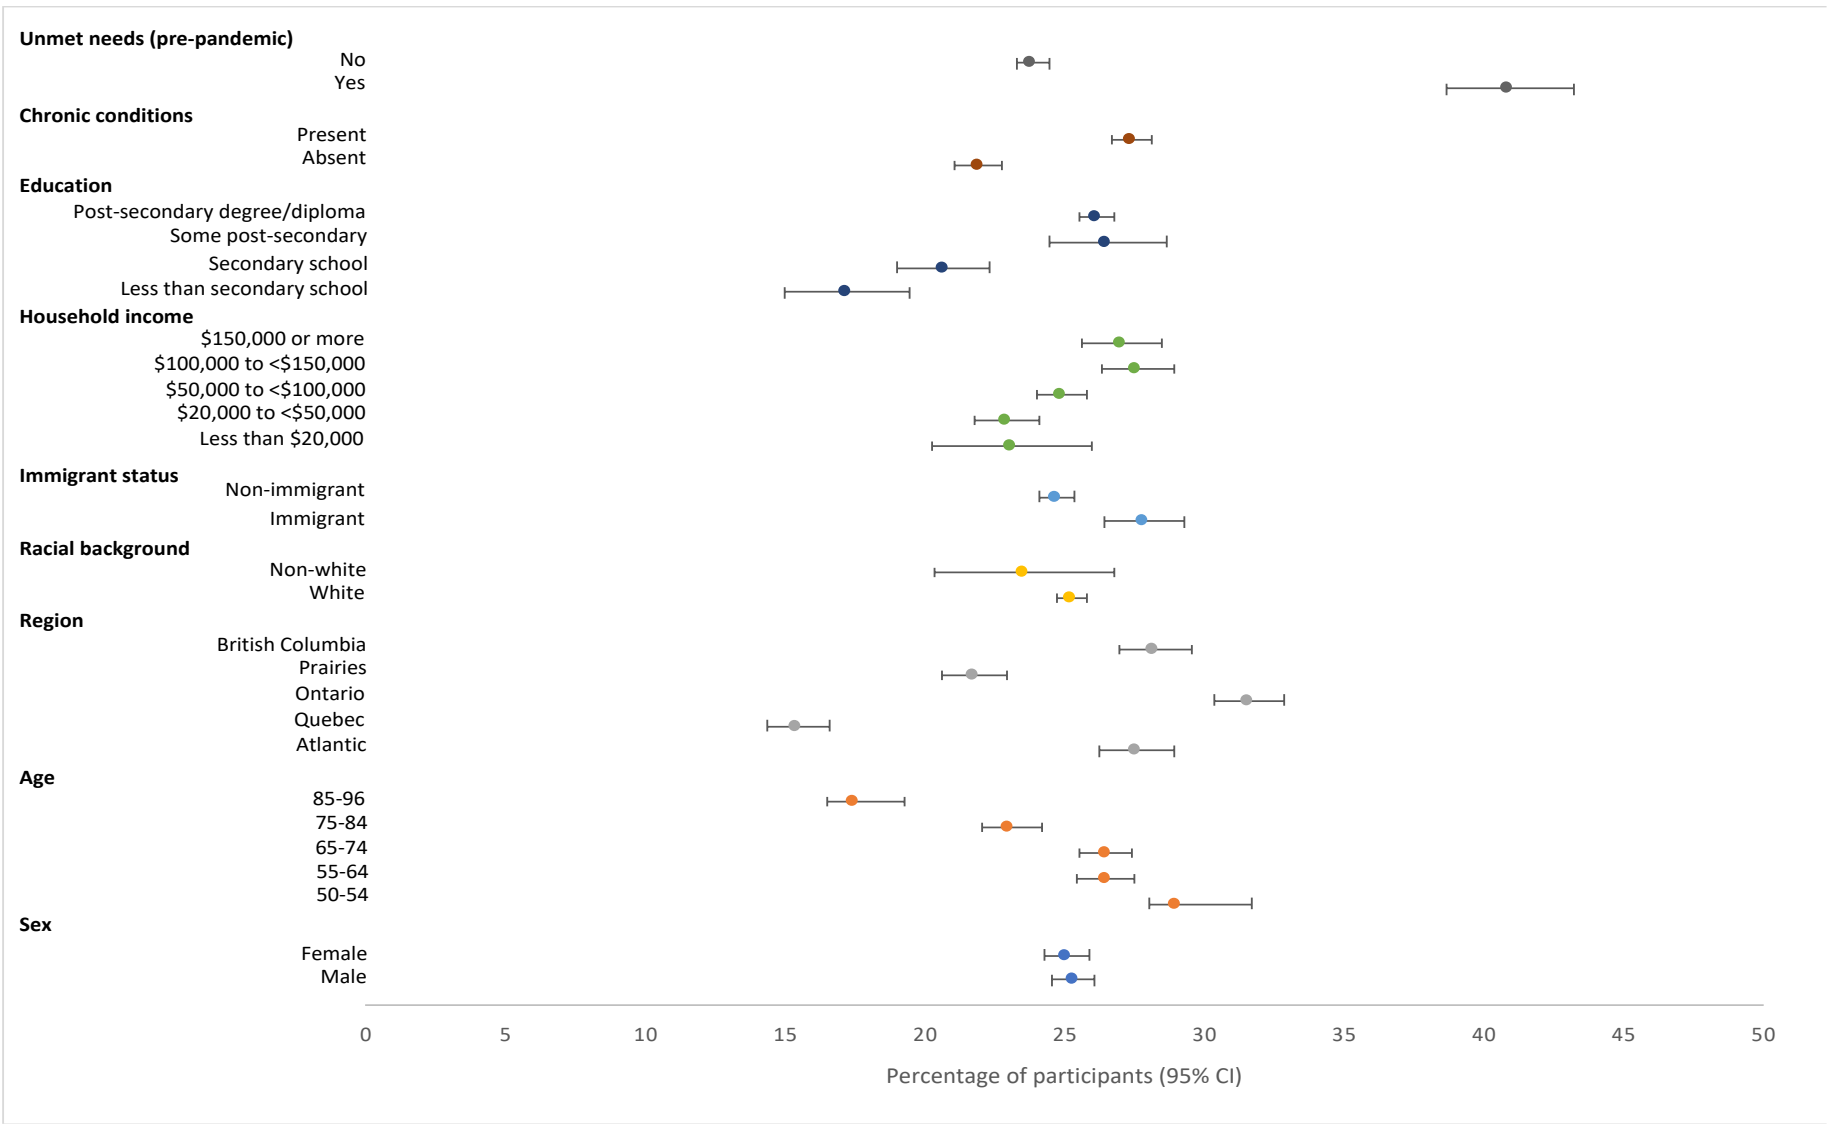

Figure 1: Prevalence of any challenges in accessing healthcare during the COVID-19 pandemic as reported by participants during the CLSA COVID-19 exit survey (Sept. to Dec. 2020), according to sociodemographic characteristics

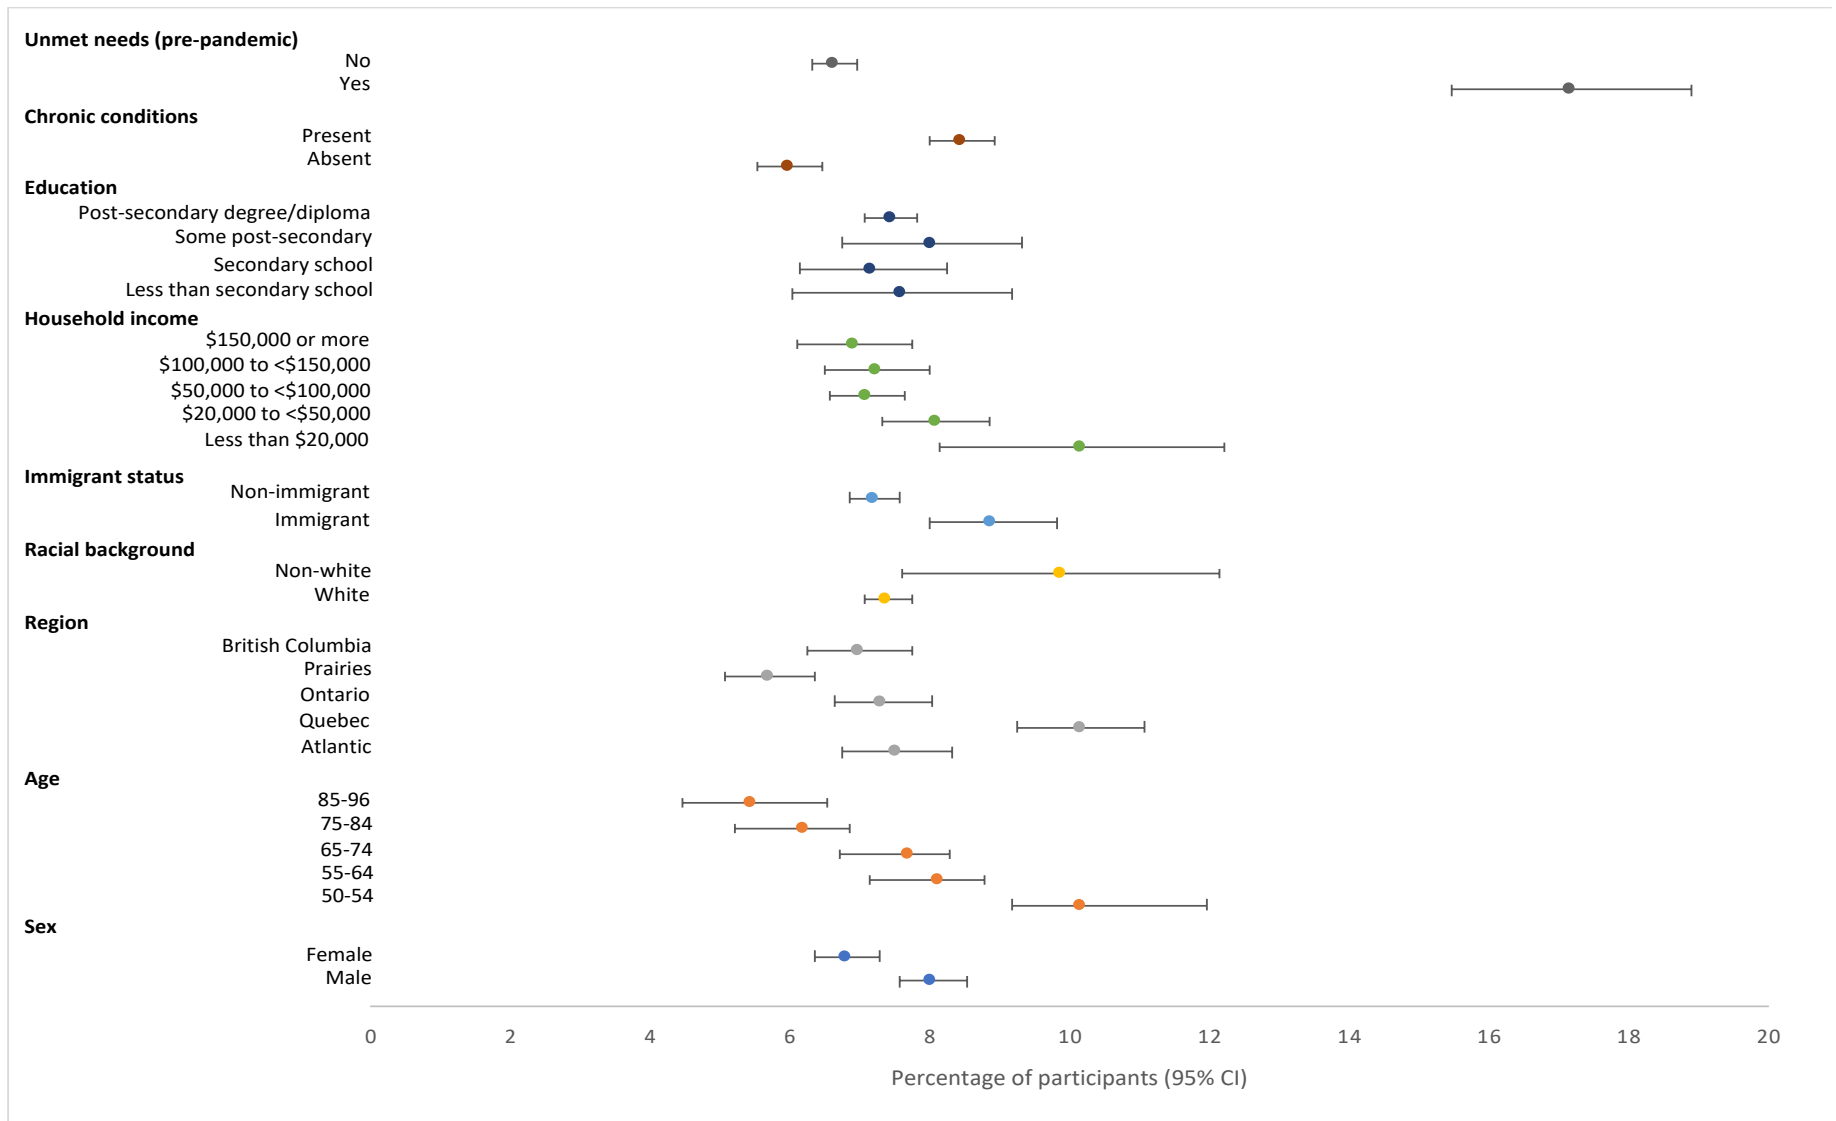

Figure 2: Prevalence of not visiting the hospital or seeing a doctor while needing to during the COVID-19 pandemic as reported by participants during the CLSA COVID-19 exit survey (Sept. to Dec. 2020), according to sociodemographic characteristics

1  
2  
3  
4  
5  
6  
7  
8  
9  
10  
11  
12  
13  
14  
15  
16  
17  
18  
19  
20  
21  
22  
23  
24  
25  
26  
27  
28  
29  
30  
31  
32  
33  
34  
35  
36  
37  
38  
39  
40  
41  
42  
43  
44  
45  
46  
47

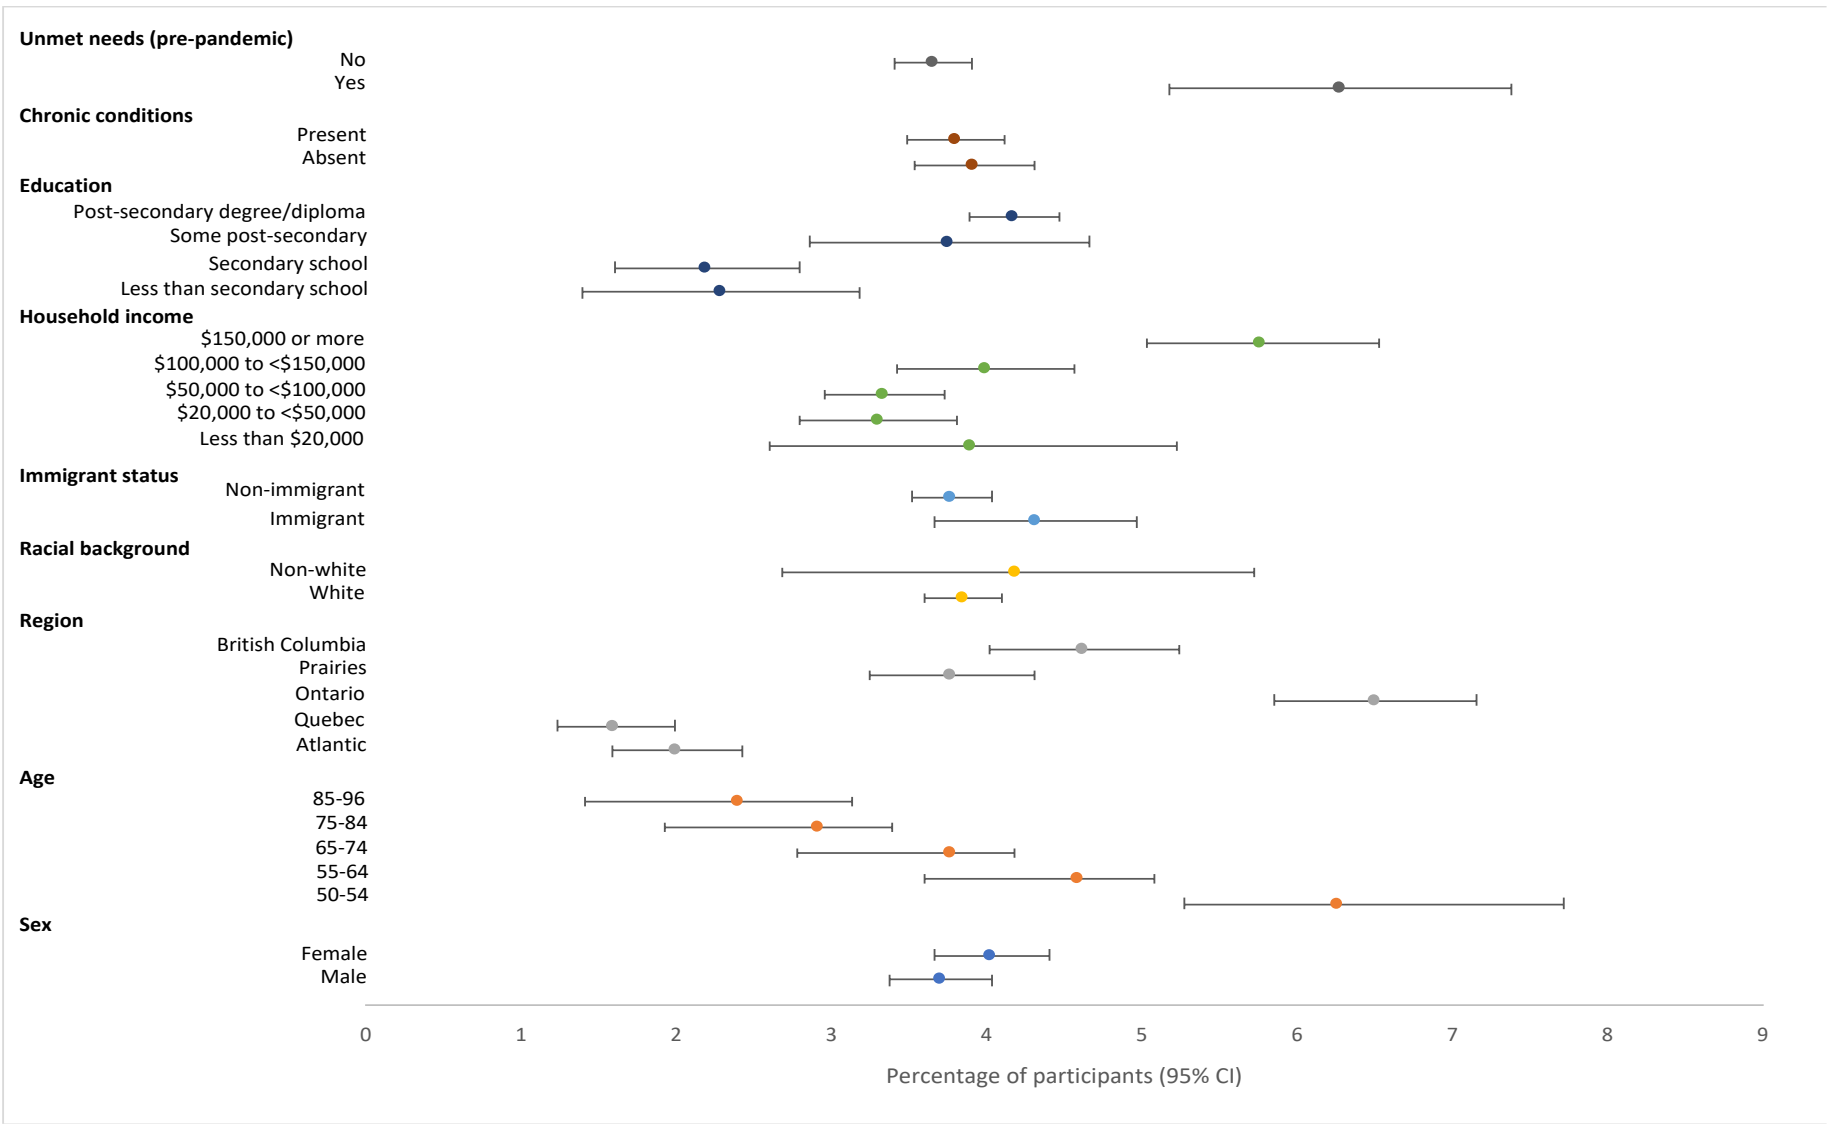

Figure 3: Prevalence of barriers to accessing testing for COVID-19 during the COVID-19 pandemic as reported by participants during the CLSA COVID-19 exit survey (Sept. to Dec. 2020), according to sociodemographic characteristics

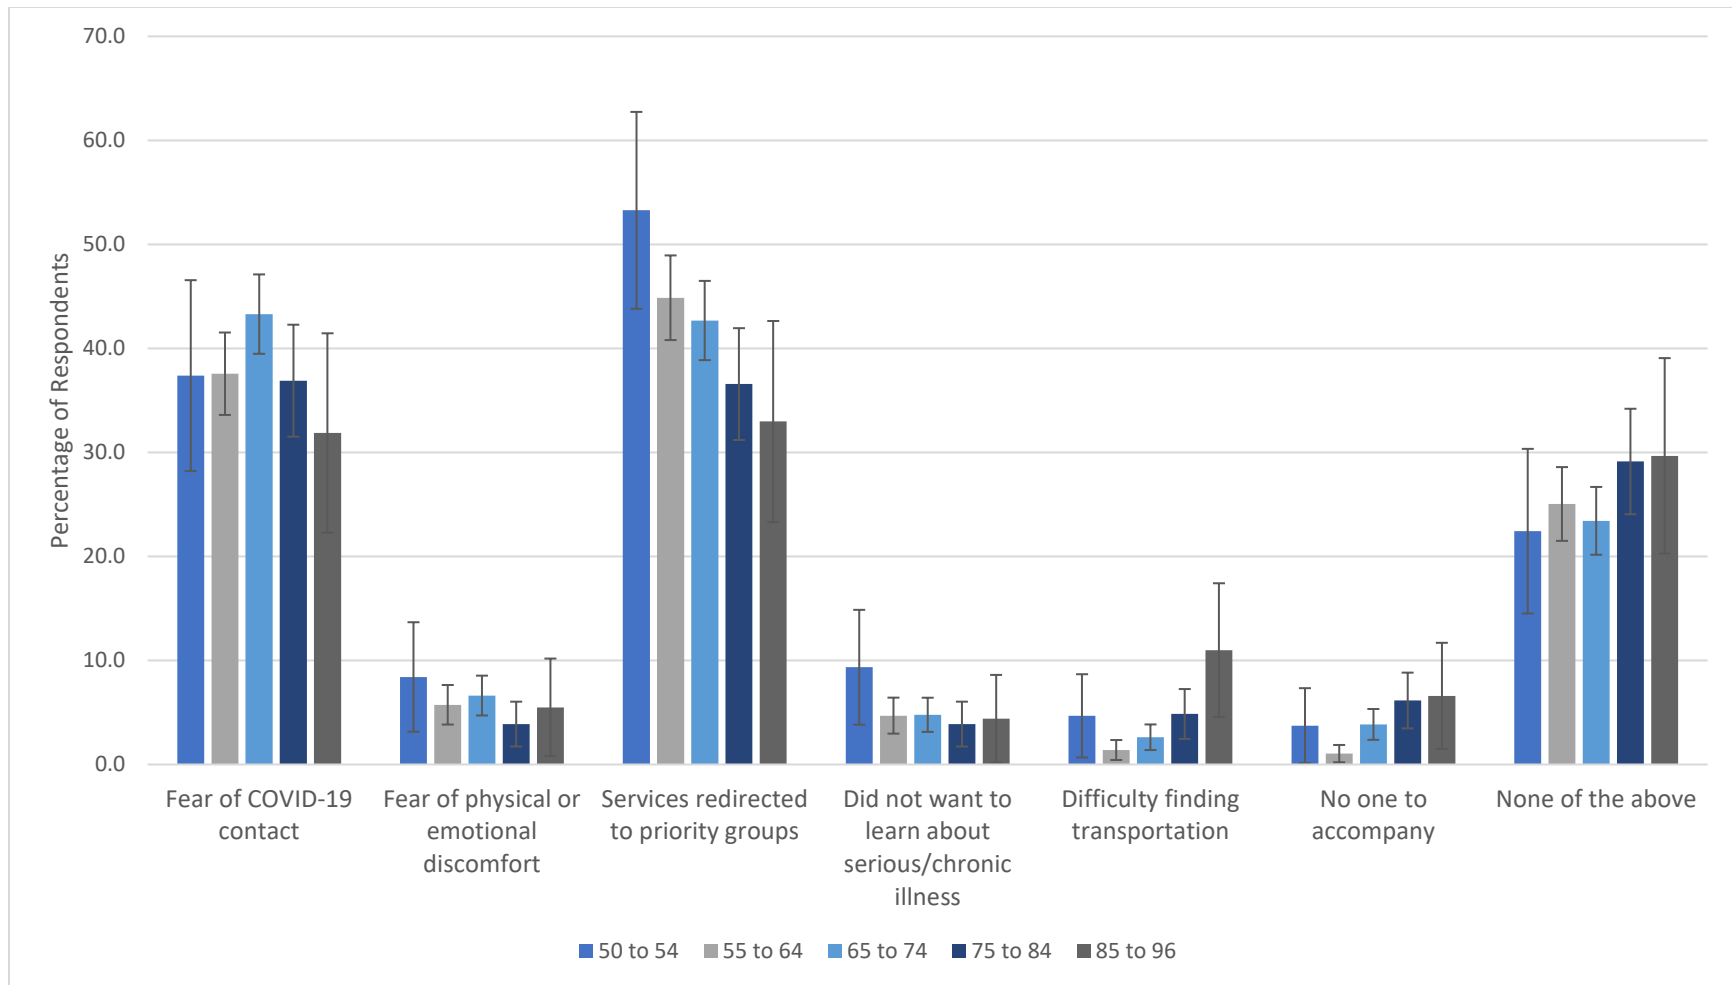

Figure 4: Reasons for not visiting the hospital or seeing a doctor while needing to as reported by participants in the CLSA COVID-19 exit survey (Sept. to Dec. 2020), stratified by age (N=1731)

1  
2  
3  
4  
5  
6  
7  
8  
9  
10  
11  
12  
13  
14  
15  
16  
17  
18  
19  
20  
21  
22  
23  
24  
25  
26  
27  
28  
29  
30  
31  
32  
33  
34  
35  
36  
37  
38  
39  
40  
41  
42  
43  
44  
45  
46  
47

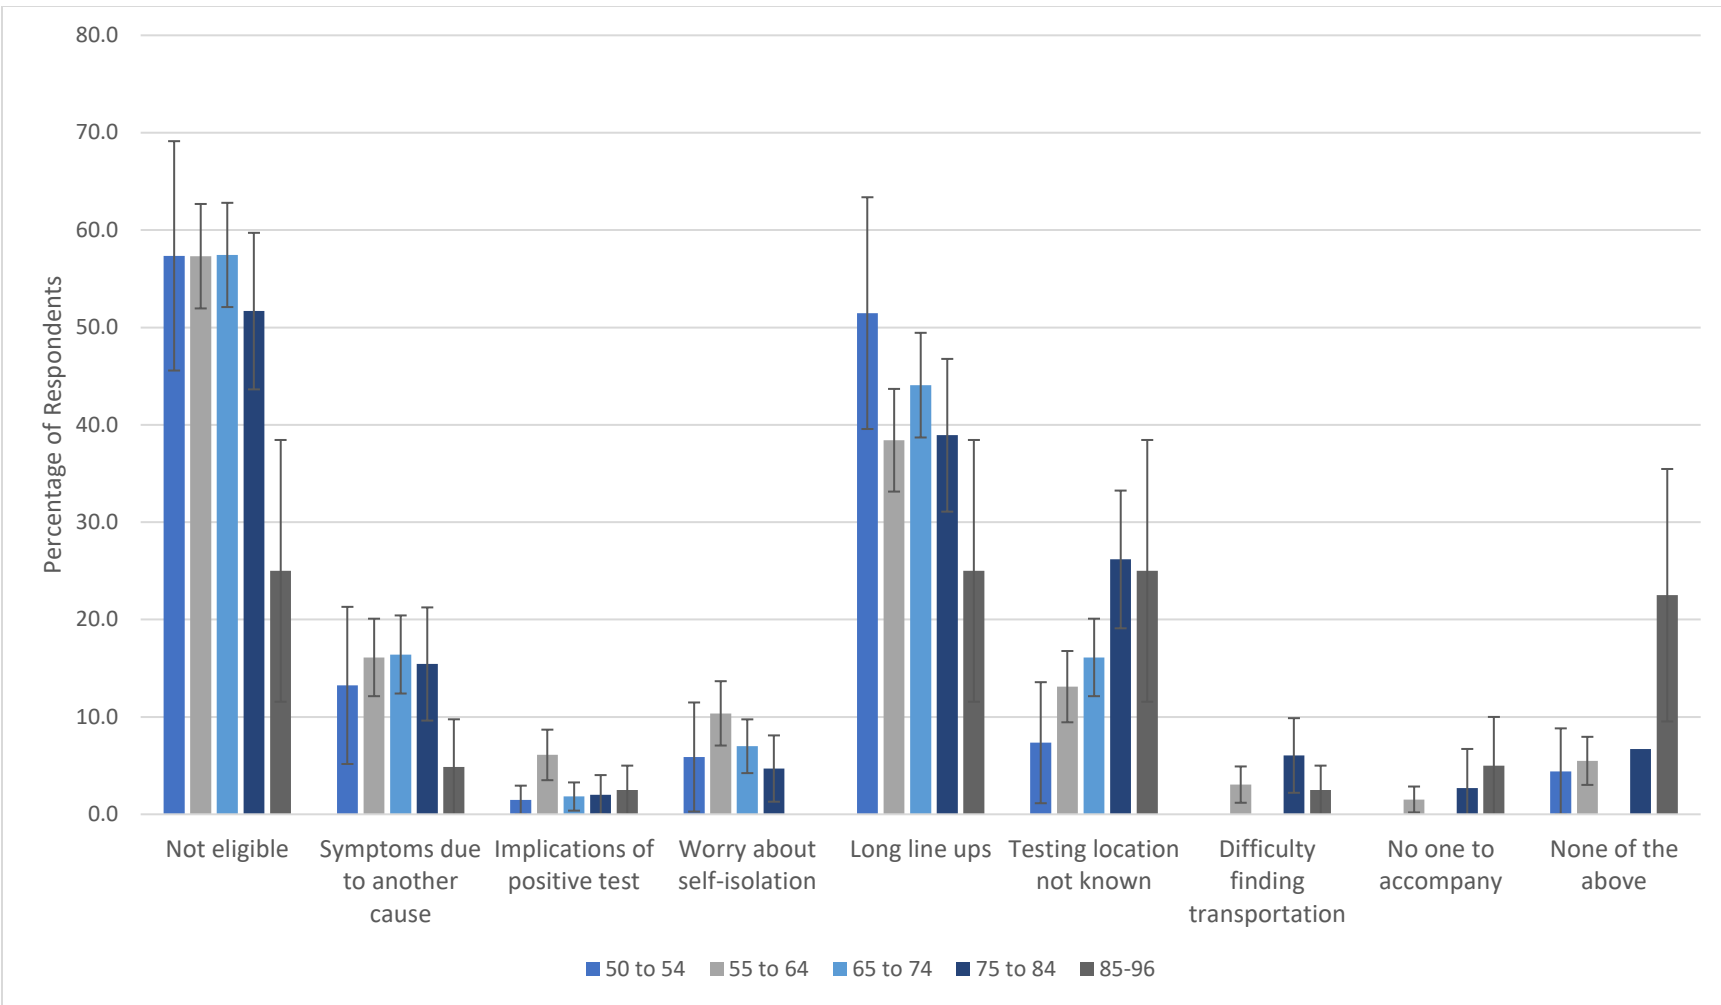

Figure 5: Barriers to accessing testing for COVID-19 as reported by participants in the CLSA COVID-19 exit survey (Sept. to Dec. 2020), stratified by age (N=914)

### Supplementary Tables & Figures

Supplementary Table 1: Logistic regression models assessing the association between sociodemographic characteristics and unmet healthcare needs during the COVID-19 pandemic as reported by participants during the CLSA COVID-19 exit survey (Sept. to Dec. 2020), adjusted for all covariates

|                          | Any challenges in<br>accessing healthcare<br><b>aOR (95% CI)</b> | Did not go to the<br>hospital or to see a<br>doctor even though<br>they needed to<br><b>aOR (95% CI)</b> | Experienced barriers<br>to accessing testing<br>for COVID-19<br><b>aOR (95% CI)</b> |
|--------------------------|------------------------------------------------------------------|----------------------------------------------------------------------------------------------------------|-------------------------------------------------------------------------------------|
| <b>Sex</b>               |                                                                  |                                                                                                          |                                                                                     |
| Male                     | Reference                                                        | Reference                                                                                                | Reference                                                                           |
| Female                   | 1.03 (0.96, 1.10)                                                | 1.13 (1.01, 1.25)                                                                                        | 0.89 (0.77, 1.03)                                                                   |
| <b>Age</b>               |                                                                  |                                                                                                          |                                                                                     |
| 50-54                    | Reference                                                        | Reference                                                                                                | Reference                                                                           |
| 55-64                    | 0.86 (0.74, 1.00)                                                | 0.74 (0.59, 0.92)                                                                                        | 0.74 (0.56, 0.99)                                                                   |
| 65-74                    | 0.85 (0.72, 0.99)                                                | 0.62 (0.48, 0.78)                                                                                        | 0.66 (0.48, 0.89)                                                                   |
| 75-84                    | 0.69 (0.58, 0.82)                                                | 0.45 (0.35, 0.59)                                                                                        | 0.50 (0.35, 0.70)                                                                   |
| 85-96                    | 0.52 (0.42, 0.64)                                                | 0.39 (0.28, 0.54)                                                                                        | 0.40 (0.25, 0.64)                                                                   |
| <b>Region</b>            |                                                                  |                                                                                                          |                                                                                     |
| Atlantic                 | Reference                                                        | Reference                                                                                                | Reference                                                                           |
| Quebec                   | 0.47 (0.42, 0.53)                                                | 1.43 (1.22, 1.68)                                                                                        | 0.68 (0.49, 0.95)                                                                   |
| Ontario                  | 1.19 (1.09, 1.31)                                                | 1.00 (0.85, 1.18)                                                                                        | 3.30 (2.57, 4.22)                                                                   |
| Prairies                 | 0.72 (0.65, 0.79)                                                | 0.78 (0.65, 0.93)                                                                                        | 1.84 (1.41, 2.40)                                                                   |
| British Columbia         | 0.98 (0.89, 1.08)                                                | 0.90 (0.76, 1.07)                                                                                        | 2.19 (1.69, 2.85)                                                                   |
| <b>Urban/Rural</b>       |                                                                  |                                                                                                          |                                                                                     |
| Urban                    | Reference                                                        | Reference                                                                                                | Reference                                                                           |
| Rural                    | 0.94 (0.87, 1.03)                                                | 1.04 (0.91, 1.20)                                                                                        | 0.93 (0.76, 1.13)                                                                   |
| <b>Racial background</b> |                                                                  |                                                                                                          |                                                                                     |
| White                    | Reference                                                        | Reference                                                                                                | Reference                                                                           |
| Non-white                | 0.74 (0.60, 0.90)                                                | 1.09 (0.81, 1.46)                                                                                        | 0.91 (0.61, 1.38)                                                                   |
| <b>Immigrant status</b>  |                                                                  |                                                                                                          |                                                                                     |

1  
2  
3  
4  
5  
6  
7  
8  
9  
10  
11  
12  
13  
14  
15  
16  
17  
18  
19  
20  
21  
22  
23  
24  
25  
26  
27  
28  
29  
30  
31  
32  
33  
34  
35  
36  
37  
38  
39  
40  
41  
42  
43  
44  
45  
46  
47

|                                                     |                   |                   |                   |
|-----------------------------------------------------|-------------------|-------------------|-------------------|
| Non-immigrant                                       | Reference         | Reference         | Reference         |
| Immigrant                                           | 1.12 (1.03, 1.22) | 1.37 (1.19, 1.58) | 0.98 (0.81, 1.19) |
| <b>Household income</b>                             |                   |                   |                   |
| Less than \$20,000                                  | 0.93 (0.76, 1.14) | 1.16 (0.86, 1.57) | 0.95 (0.62, 1.46) |
| \$20,000 to <\$50,000                               | 0.93 (0.82, 1.04) | 1.10 (0.91, 1.34) | 0.84 (0.65, 1.08) |
| \$50,000 to <\$100,000                              | 0.98 (0.89, 1.08) | 1.02 (0.87, 1.20) | 0.72 (0.59, 0.89) |
| \$100,000 to <\$150,000                             | 1.05 (0.95, 1.16) | 1.04 (0.87, 1.24) | 0.76 (0.62, 0.94) |
| \$150,000 or more                                   | Reference         | Reference         | Reference         |
| <b>Education</b>                                    |                   |                   |                   |
| Less than secondary school                          | 0.72 (0.60, 0.86) | 1.05 (0.81, 1.35) | 0.67 (0.43, 1.06) |
| Secondary school                                    | 0.77 (0.69, 0.86) | 0.95 (0.80, 1.14) | 0.51 (0.37, 0.70) |
| Some post-secondary                                 | 0.96 (0.86, 1.09) | 1.09 (0.89, 1.32) | 0.85 (0.65, 1.11) |
| Post-secondary diploma or more                      | Reference         | Reference         | Reference         |
| <b>Marital status</b>                               |                   |                   |                   |
| Married or living with a partner                    | Reference         | Reference         | Reference         |
| Single, never married or never lived with a partner | 1.15 (1.02, 1.30) | 0.94 (0.77, 1.14) | 1.21 (0.92, 1.58) |
| Widowed                                             | 0.94 (0.83, 1.07) | 1.09 (0.90, 1.33) | 1.02 (0.75, 1.37) |
| Divorced or separated                               | 1.12 (1.00, 1.25) | 1.17 (0.99, 1.38) | 1.20 (0.95, 1.52) |
| <b>Chronic conditions</b>                           |                   |                   |                   |
| Absent                                              | Reference         | Reference         | Reference         |
| Present                                             | 1.46 (1.36, 1.56) | 1.53 (1.37, 1.71) | 1.11 (0.96, 1.28) |
| <b>Dwelling type</b>                                |                   |                   |                   |
| House                                               | Reference         | Reference         | Reference         |
| Apartment                                           | 0.96 (0.88, 1.05) | 1.04 (0.91, 1.20) | 1.15 (0.95, 1.40) |
| Other                                               | 0.98 (0.81, 1.19) | 1.14 (0.86, 1.51) | 1.00 (0.63, 1.60) |
| <b>Work status</b>                                  |                   |                   |                   |
| Do not work outside the home                        | Reference         | Reference         | Reference         |
| Usually work outside the home                       | 0.97 (0.89, 1.05) | 0.92 (0.80, 1.05) | 1.09 (0.92, 1.30) |
| <b>Unmet needs (pre-pandemic)</b>                   |                   |                   |                   |
| Yes                                                 | 2.23 (2.00, 2.47) | 2.55 (2.21, 2.94) | 1.70 (1.37, 2.12) |
| No                                                  | Reference         | Reference         | Reference         |



Supplementary Table 2: Frequency of types of challenges experienced accessing healthcare reported by CLSA COVID-19 exit survey (Sept. to Dec. 2020) participants (N=5960)

| <b>Service</b>                             | <b>N (%)</b> |
|--------------------------------------------|--------------|
| Primary care                               | 4009 (67.3)  |
| Specialist care                            | 2261 (37.9)  |
| Prescription medication                    | 567 (9.5)    |
| Pharmacist                                 | 91 (1.5)     |
| Diagnostic testing                         | 1782 (29.9)  |
| Screening test/surgery                     | 779 (13.1)   |
| Delay of scheduled surgery                 | 492 (8.3)    |
| Unable to use zoom/no access to a computer | 206 (3.5)    |
| None of the above                          | 246 (4.1)    |

Supplementary Table 3: Frequency of reasons for not visiting the hospital or seeing a doctor while needing to reported by CLSA COVID-19 exit survey (Sept. to Dec. 2020) participants (N=1731)

| <b>Service</b>                                      | <b>N (%)</b> |
|-----------------------------------------------------|--------------|
| Fear of COVID-19 contact                            | 680 (39.3)   |
| Fear of physical or emotional discomfort            | 102 (5.9)    |
| Services redirected to priority groups              | 735 (42.5)   |
| Did not want to learn about chronic/serious illness | 84 (4.8)     |
| Difficulty finding transportation                   | 55 (3.2)     |
| No one to accompany                                 | 60 (3.5)     |
| None of the above                                   | 437 (25.2)   |

1  
2  
3  
4  
5  
6  
7  
8  
9  
10  
11  
12  
13  
14  
15  
16  
17  
18  
19  
20  
21  
22  
23  
24  
25  
26  
27  
28  
29  
30  
31  
32  
33  
34  
35  
36  
37  
38  
39  
40  
41  
42  
43  
44  
45  
46  
47

Supplementary Table 4: Frequency of barriers to accessing testing for COVID-19 reported by CLSA COVID-19 exit survey (Sept. to Dec. 2020) participants (N=914)

| <b>Service</b>                    | <b>N (%)</b> |
|-----------------------------------|--------------|
| Not eligible                      | 503 (55.0)   |
| Symptoms due to another cause     | 141 (15.4)   |
| Implications of positive test     | 31 (3.4)     |
| Worry about self-isolation        | 68 (7.4)     |
| Long line ups                     | 374 (40.9)   |
| Testing location not known        | 150 (16.4)   |
| Difficulty finding transportation | 37 (4.0)     |
| No one to accompany               | 20 (2.2)     |
| None of the above                 | 73 (8.0)     |

Confidential

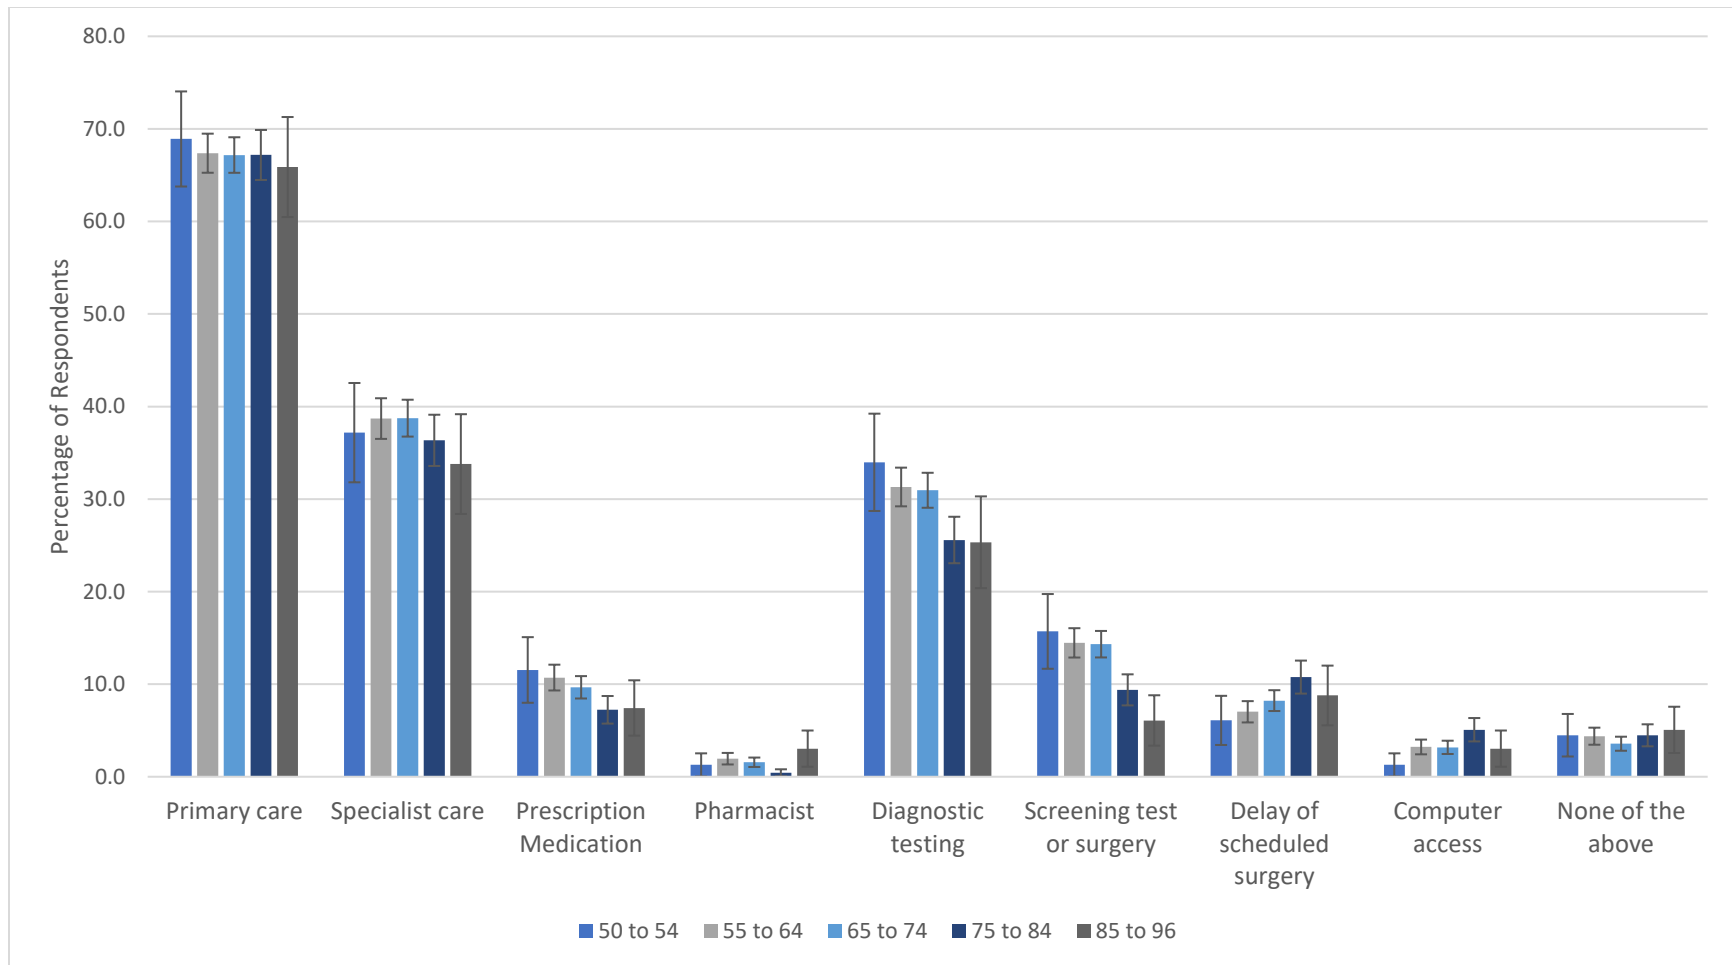

Supplementary Figure 1: Frequency of types of challenges experienced accessing healthcare, as reported by participants in the CLSA COVID-19 exit survey (Sept. to Dec. 2020), stratified by age (N=5960)

1  
2  
3  
4  
5  
6  
7  
8  
9  
10  
11  
12  
13  
14  
15  
16  
17  
18  
19  
20  
21  
22  
23  
24  
25  
26  
27  
28  
29  
30  
31  
32  
33  
34  
35  
36  
37  
38  
39  
40  
41  
42  
43  
44  
45  
46  
47

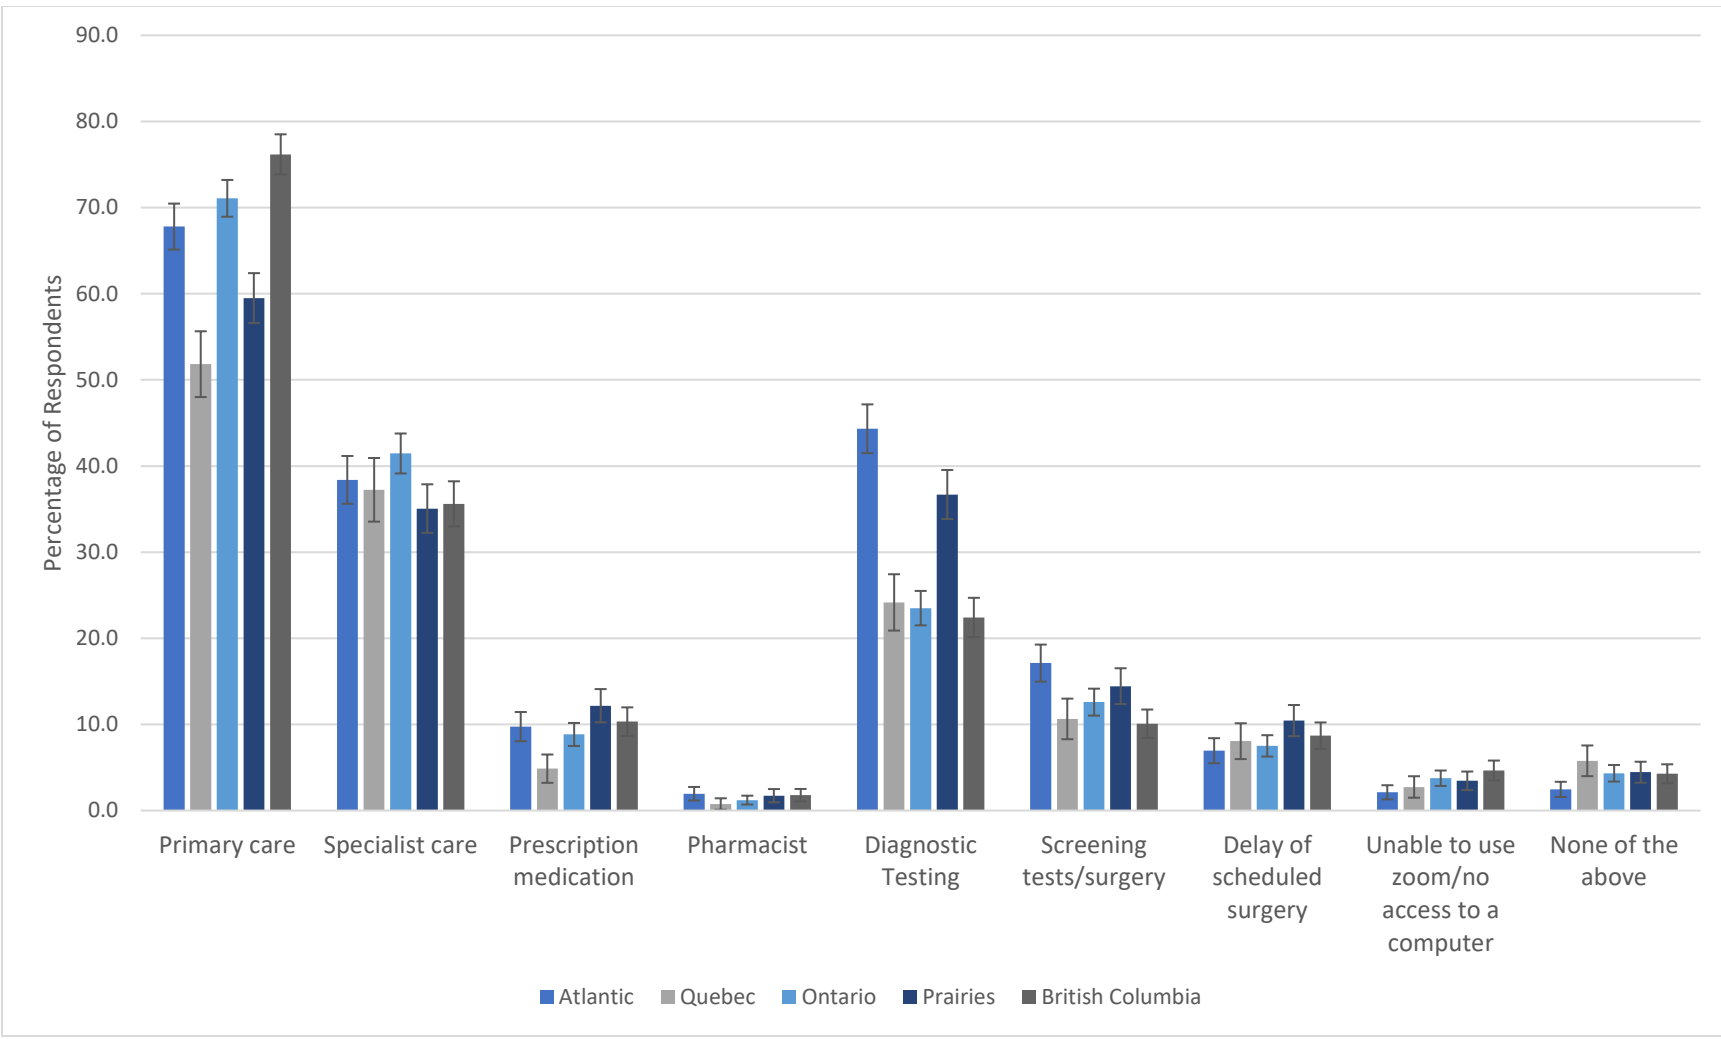

Supplementary Figure 2: Frequency of types of challenges experienced accessing healthcare as reported by participants in the CLSA COVID-19 exit survey (Sept. to Dec. 2020), stratified by province (N=5960)

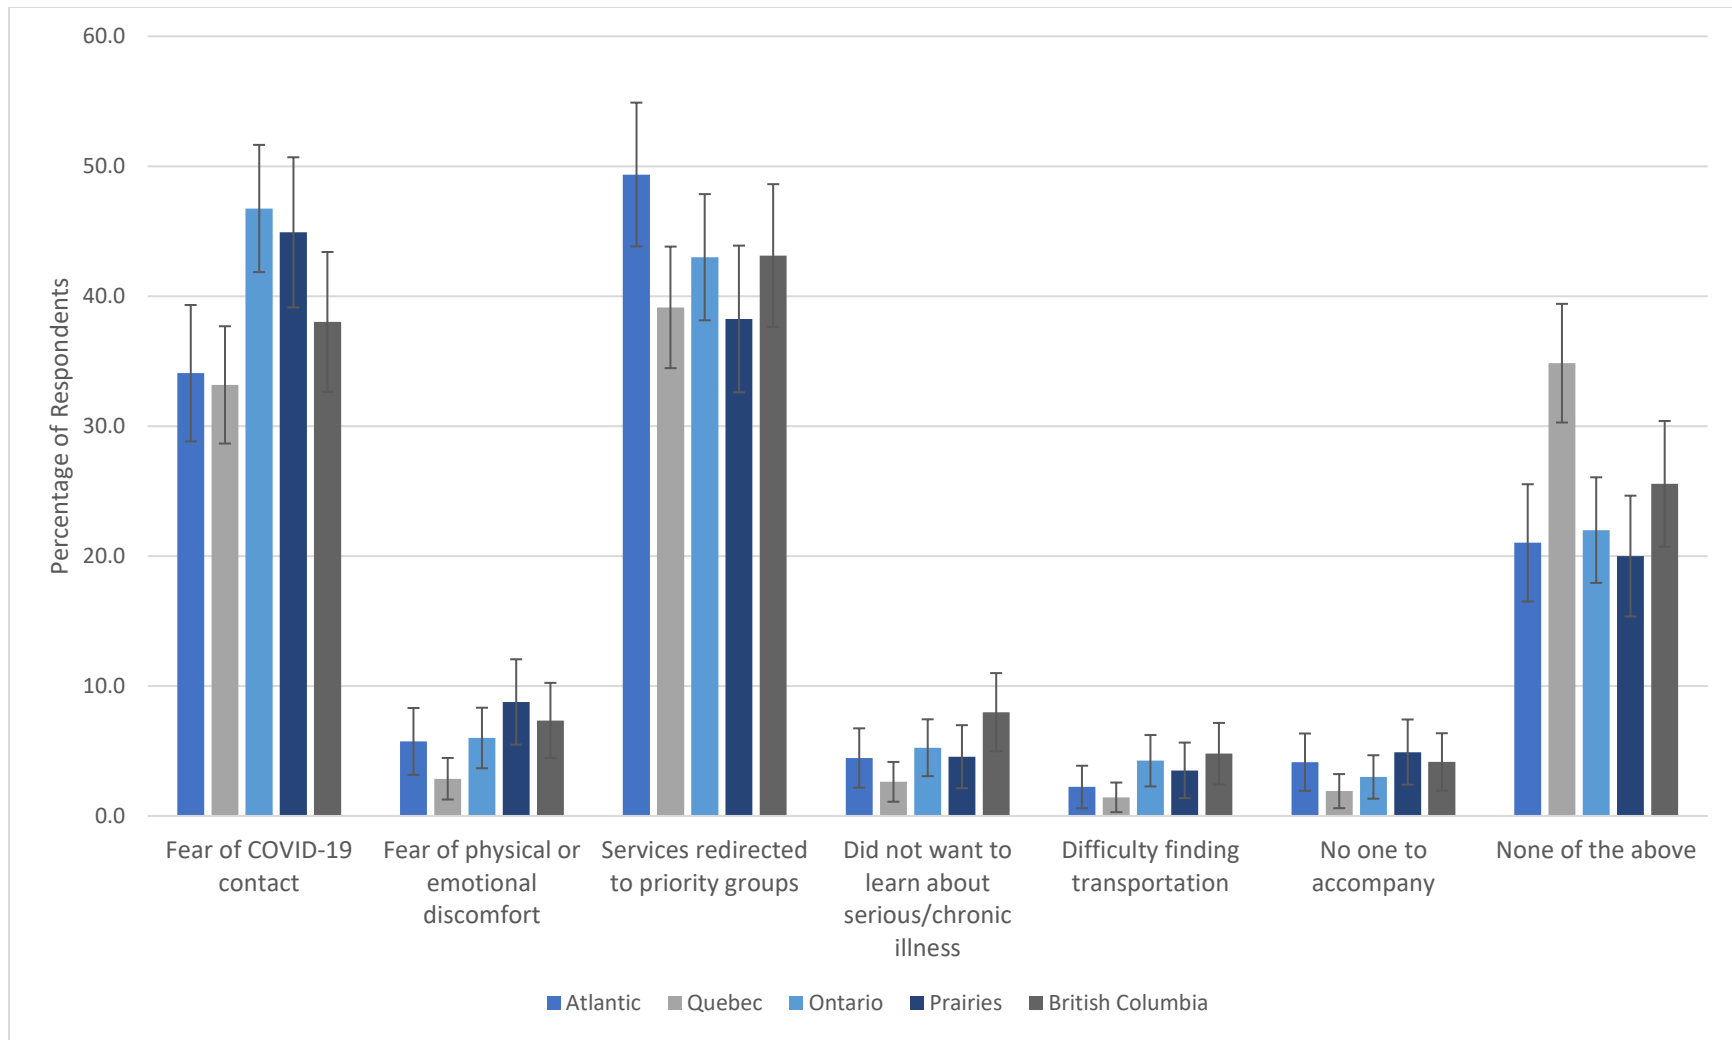

Supplementary Figure 3: Reasons for not visiting the hospital or seeing a doctor while needing to as reported by participants in the CLSA COVID-19 exit survey (Sept. to Dec. 2020), stratified by province (N=1731)

1  
2  
3  
4  
5  
6  
7  
8  
9  
10  
11  
12  
13  
14  
15  
16  
17  
18  
19  
20  
21  
22  
23  
24  
25  
26  
27  
28  
29  
30  
31  
32  
33  
34  
35  
36  
37  
38  
39  
40  
41  
42  
43  
44  
45  
46  
47

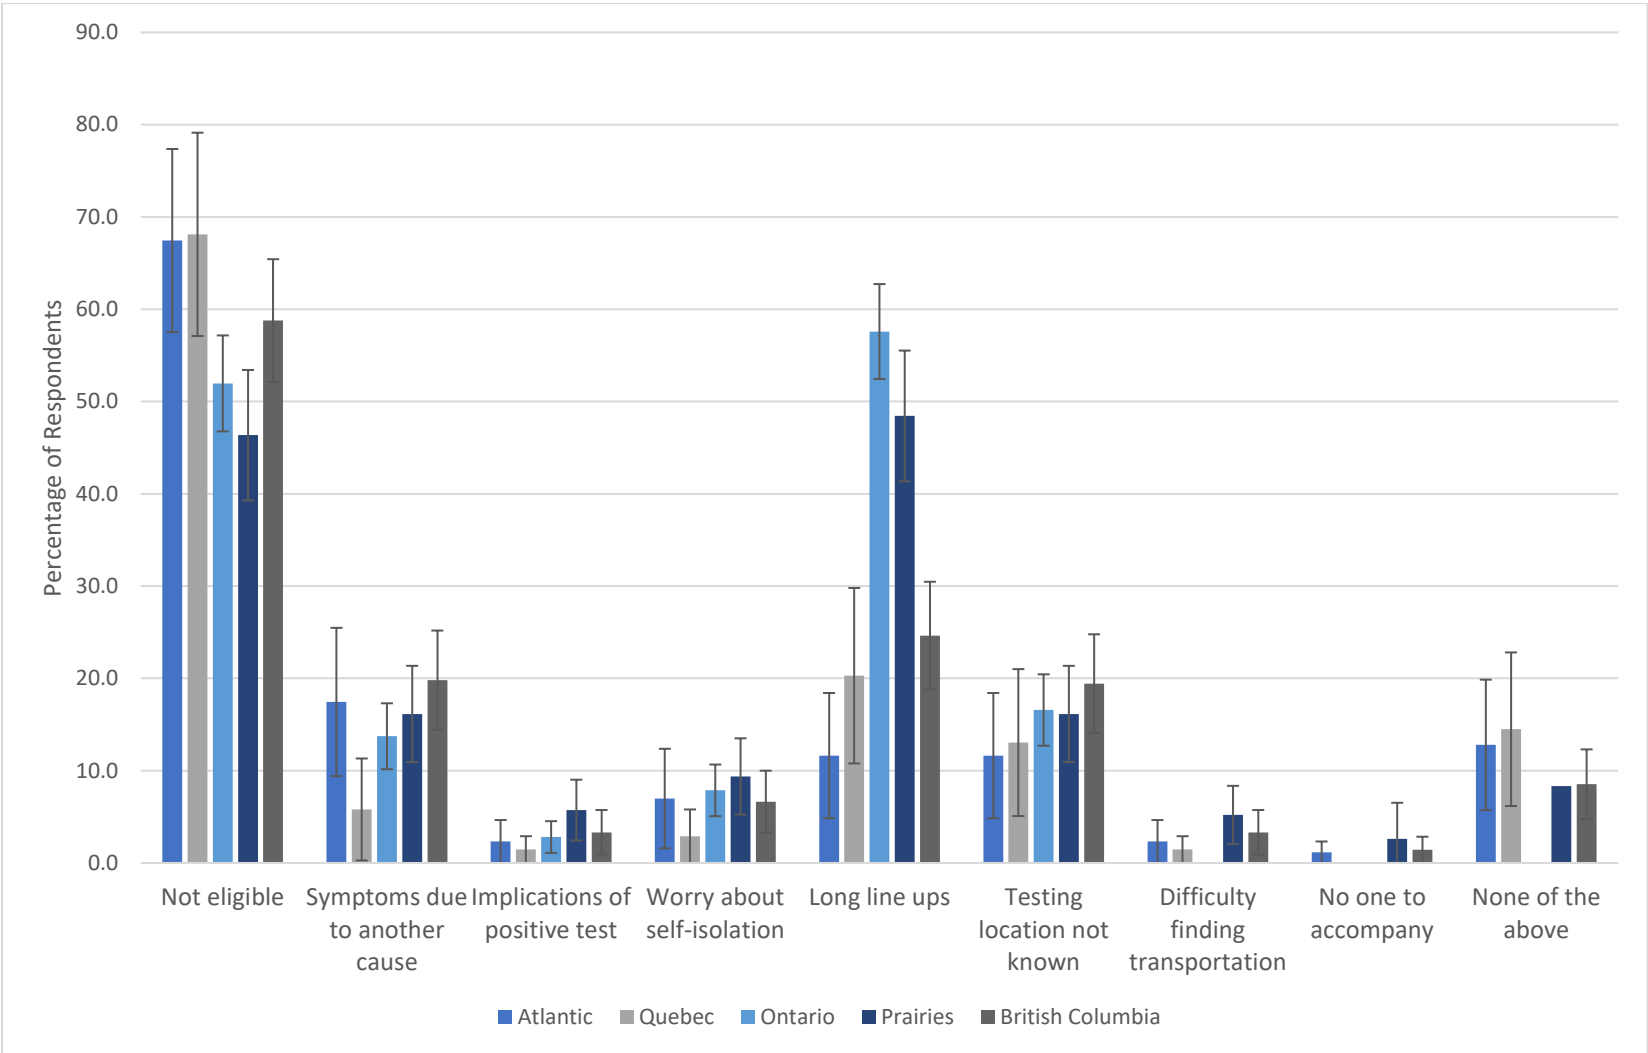

Supplementary Figure 4: Barriers to accessing COVID-19 testing as reported by participants in the CLSA COVID-19 exit survey (Sept. to Dec. 2020), stratified by province (N=914)

## References

1. Unruh L, Allin S, Marchildon G, Burke S, Barry S, Siersbaek R, Thomas S, Rajan S, Koval A, Alexander M, Merkur S. A comparison of 2020 health policy responses to the COVID-19 pandemic in Canada, Ireland, the United Kingdom and the United States of America. *Health Policy*. 2021 Jul 1.
2. Urbach DR, Martin D. Confronting the COVID-19 surgery crisis: time for transformational change. *CMAJ*. 2020 May 25;192(21):E585–6.
3. Canadian Institute for Health Information. How COVID-19 affected physician services [Internet]. [cited 2021 Aug 23]. Available from: <https://www.cihi.ca/en/covid-19-resources/impact-of-covid-19-on-canadas-health-care-systems/how-covid-19-affected-physician-services>
4. Canadian Institute for Health Information. How COVID-19 affected emergency departments [Internet]. [cited 2021 Aug 10]. Available from: <https://www.cihi.ca/en/covid-19-resources/impact-of-covid-19-on-canadas-health-care-systems/how-covid-19-affected>
5. Canadian Institute for Health Information. COVID-19's effect on hospital care services [Internet]. [cited 2021 Apr 6]. Available from: <https://www.cihi.ca/en/covid-19-resources/impact-of-covid-19-on-canadas-health-care-systems/covid-19s-effect-on-hospital>
6. Glazier RH, Green ME, Wu FC, Frymire E, Kopp A, Kiran T. Shifts in office and virtual primary care during the early COVID-19 pandemic in Ontario, Canada. *CMAJ*. 2021 Feb 8;193(6):E200-10.
7. Jones A, Maclagan LC, Schumacher C, Wang X, Jaakkimainen RL, Guan J, Swartz RH, Bronskill SE. Impact of the COVID-19 pandemic on home care services among community-dwelling adults with dementia. *Journal of the American Medical Directors Association*. 2021 Nov 1;22(11):2258-62.
8. Moynihan R, Sanders S, Michaleff ZA, Scott AM, Clark J, To EJ, et al. Impact of COVID-19 pandemic on utilisation of healthcare services: a systematic review. *BMJ Open*. 2021 Mar;11(3):e045343.
9. Nelson CH, Park J. The nature and correlates of unmet health care needs in Ontario, Canada. *Social Science & Medicine*. 2006 May 1;62(9):2291–300.

- 1
  - 2
  - 3
  - 4
  - 5
  - 6
  - 7
  - 8
  - 9
  - 10
  - 11
  - 12
  - 13
  - 14
  - 15
  - 16
  - 17
  - 18
  - 19
  - 20
  - 21
  - 22
  - 23
  - 24
  - 25
  - 26
  - 27
  - 28
  - 29
  - 30
  - 31
  - 32
  - 33
  - 34
  - 35
  - 36
  - 37
  - 38
  - 39
  - 40
  - 41
  - 42
  - 43
  - 44
  - 45
  - 46
  - 47
10. Watson L, Qi S, Delure A, Link C, Photitai E, Chmielewski L, Hildebrand A, Ruether D, Rawson K. Virtual cancer care during the COVID-19 pandemic in Alberta: Evidence from a mixed methods evaluation and key learnings. *JCO Oncology Practice*. 2021 Sept 17(9):e1354-61.
11. Lun R, Walker G, Daham Z, Ramsay T, Portela de Oliveira E, Kassab M, et al. Transition to virtual appointments for interventional neuroradiology due to the COVID-19 pandemic: a survey of satisfaction. *Journal of NeuroInterventional Surgery*. 2020 Oct 7;neurintsurg-2020-016805.
12. D'Alessandro LN, Brown SC, Campbell F, Ruskin D, Mesaroli G, Makkar M, et al. Rapid mobilization of a virtual pediatric chronic pain clinic in Canada during the COVID-19 pandemic. *Canadian Journal of Pain*. 2020 Jan 1;4(1):162–7.
13. Liu L, Goodarzi Z, Jones A, Posno R, Straus SE, Watt JA. Factors associated with virtual care access in older adults: a cross-sectional study. *Age and Ageing*. 2021 Jul 1;50(4):1412–5.
14. Rasanathan K, Montesinos EV, Matheson D, Etienne C, Evans T. Primary health care and the social determinants of health: essential and complementary approaches for reducing inequities in health. *Journal of Epidemiology & Community Health*. 2011 Aug 1;65(8):656-60.
15. Government of Canada SC. Unmet health care needs, 2014 [Internet]. 2016 [cited 2021 Aug 10]. Available from: <https://www150.statcan.gc.ca/n1/pub/82-625-x/2016001/article/14310-eng.htm>
16. Ahmed S, Shommu NS, Rumana N, Barron GRS, Wicklum S, Turin TC. Barriers to Access of Primary Healthcare by Immigrant Populations in Canada: A Literature Review. *J Immigrant Minority Health*. 2016 Dec 1;18(6):1522–40.
17. Raina P, Wolfson C, Kirkland S, Griffith LE, Balion C, Cossette B, et al. Cohort Profile: The Canadian Longitudinal Study on Aging (CLSA). *International Journal of Epidemiology*. 2019 Dec 1;48(6):1752–1753j.
18. Menec VH, Newall NE, Mackenzie CS, Shooshtari S, Nowicki S. Examining individual and geographic factors associated with social isolation and loneliness using Canadian Longitudinal Study on Aging (CLSA) data. *PLoS One*. 2019 Feb 1;14(2):e0211143.
19. Raina P, Wolfson C, Griffith LE, Kirkland S, McMilian J, Basta N, et al. The impact of the COVID-19 pandemic on the mental health of older adults: A longitudinal analysis from the Canadian Longitudinal Study on Aging. *Nature Aging*, forthcoming.



- 1
  - 2
  - 3
  - 4
  - 5
  - 6
  - 7
  - 8
  - 9
  - 10
  - 11
  - 12
  - 13
  - 14
  - 15
  - 16
  - 17
  - 18
  - 19
  - 20
  - 21
  - 22
  - 23
  - 24
  - 25
  - 26
  - 27
  - 28
  - 29
  - 30
  - 31
  - 32
  - 33
  - 34
  - 35
  - 36
  - 37
  - 38
  - 39
  - 40
  - 41
  - 42
  - 43
  - 44
  - 45
  - 46
  - 47
20. Allan I, Ammi M. Evolution of the determinants of unmet health care needs in a universal health care system: Canada, 2001–2014. *Health, Economics, Policy and Law*. 2020 Aug 18;1–24.
21. Smolić Š, Čipin I, Međimurec P. Access to healthcare for people aged 50+ in Europe during the COVID-19 outbreak. *European Journal of Ageing*. 2021 Jun 11:1-7.
22. Fisman DN, Greer AL, Hillmer M, O’Brien SF, Drews SJ, Tuite AR. COVID-19 Case Age Distribution: Correction for Differential Testing by Age [Internet]. *Infectious Diseases (except HIV/AIDS)*; 2020 Sep [cited 2021 Aug 22]. Available from: <http://medrxiv.org/lookup/doi/10.1101/2020.09.15.20193862>
23. Government of Canada SC. COVID-19 testing: Do Canadians plan to get tested and why? [Internet]. 2020 [cited 2021 Aug 21]. Available from: <https://www150.statcan.gc.ca/n1/pub/45-28-0001/2020001/article/00072-eng.htm>
24. Ronksley PE, Sanmartin C, Quan H, Ravani P, Tonelli M, Manns B, et al. Association between perceived unmet health care needs and risk of adverse health outcomes among patients with chronic medical conditions. *Open Med*. 2013 Feb 26;7(1):e21–30.
25. Argintaru N, Chambers C, Gogosis E, Farrell S, Palepu A, Klodawsky F, et al. A cross-sectional observational study of unmet health needs among homeless and vulnerably housed adults in three Canadian cities. *BMC Public Health*. 2013 Jun 13;13(1):577.
26. McColl MA, Jarzynowska A, Shortt SED. Unmet health care needs of people with disabilities: population level evidence. *Disability & Society*. 2010 Mar;25(2):205–18.
27. Lasser KE, Himmelstein DU, Woolhandler S. Access to Care, Health Status, and Health Disparities in the United States and Canada: Results of a Cross-National Population-Based Survey. *American Journal of Public Health*. 2006 Jul;96(7):1300–7.
28. Wu DC, Jha P, Lam T, Brown P, Gelband H, Nagelkerke N, et al. Predictors of self-reported symptoms and testing for COVID-19 in Canada using a nationally representative survey. *PLOS ONE*. 2020 Oct 21;15(10):e0240778.
29. Penning MJ, Zheng C. Income Inequities in Health Care Utilization among Adults Aged 50 and Older. *Canadian Journal on Aging*. 2016 Mar;35(1):55–69.

1  
2  
3  
4  
5  
6  
7  
8  
9  
10  
11  
12  
13  
14  
15  
16  
17  
18  
19  
20  
21  
22  
23  
24  
25  
26  
27  
28  
29  
30  
31  
32  
33  
34  
35  
36  
37  
38  
39  
40  
41  
42  
43  
44  
45  
46  
47

30. Mielck A, Kiess R, Knesebeck O von dem, Stirbu I, Kunst AE. Association between forgone care and household income among the elderly in five Western European countries – analyses based on survey data from the SHARE-study. BMC Health Services Research. 2009 Mar 23;9(1):52.

31. Breton M, Brousselle A, Boivin A, Loignon C, Touati N, Dubois C-A, et al. Evaluation of the implementation of centralized waiting lists for patients without a family physician and their effects across the province of Quebec. Implementation Science. 2014 Sep 4;9(1):117.

32. Public Health Agency of Canada. COVID-19 daily epidemiology update [Internet]. 2020 [cited 2021 Aug 10]. Available from: <https://health-infobase.canada.ca/covid-19/epidemiological-summary-covid-19-cases.html>

Confidential
